# Supplementary material for: Identifying early warning signs for diagnostic errors in primary care: a qualitative study
Source: PubMed Central journal article supplement — BMJ Open. 2012 Sep 13;2(5):e001539. doi: 10.1136/bmjopen-2012-001539 (PMC3467597; doi:10.1136/bmjopen-2012-001539), 2012-09-13
Supplement: bmjopen-2012-001539.draft_revisions.pdf [file bmjopen-2012-001539.draft_revisions.pdf]

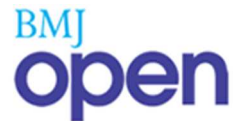

**Identifying early warning signs for diagnostic errors in primary care: a qualitative study**

|                                 |                                                                                                                                                                                                                                                                                              |
|---------------------------------|----------------------------------------------------------------------------------------------------------------------------------------------------------------------------------------------------------------------------------------------------------------------------------------------|
| Journal:                        | <i>BMJ Open</i>                                                                                                                                                                                                                                                                              |
| Manuscript ID:                  | bmjopen-2012-001539                                                                                                                                                                                                                                                                          |
| Article Type:                   | Research                                                                                                                                                                                                                                                                                     |
| Date Submitted by the Author:   | 23-May-2012                                                                                                                                                                                                                                                                                  |
| Complete List of Authors:       | Balla, John; University of Oxford, Centre for Evidence-based Medicine<br>Heneghan, Carl; University of Oxford, Centre for Evidence-based Medicine<br>Goyder, Clare; University of Oxford, Centre for Evidence-based Medicine<br>Thompson, Matthew; University of Oxford, Primary Health Care |
| <b>Primary Subject Heading</b>: | Diagnostics                                                                                                                                                                                                                                                                                  |
| Secondary Subject Heading:      | Evidence based practice, General practice / Family practice, Medical education and training                                                                                                                                                                                                  |
| Keywords:                       | EDUCATION & TRAINING (see Medical Education & Training), Risk management < HEALTH SERVICES ADMINISTRATION & MANAGEMENT, PRIMARY CARE, QUALITATIVE RESEARCH, Clinical reasoning, Clinical decision making                                                                                     |
|                                 |                                                                                                                                                                                                                                                                                              |

SCHOLARONE™  
Manuscripts

1  
2  
3  
4  
5  
6  
7  
8  
9  
10  
11  
12  
13  
14  
15  
16  
17  
18  
19  
20  
21  
22  
23  
24  
25  
26  
27  
28  
29  
30  
31  
32  
33  
34  
35  
36  
37  
38  
39  
40  
41  
42  
43  
44  
45  
46  
47  
48  
49  
50  
51  
52  
53  
54  
55  
56  
57  
58  
59  
60

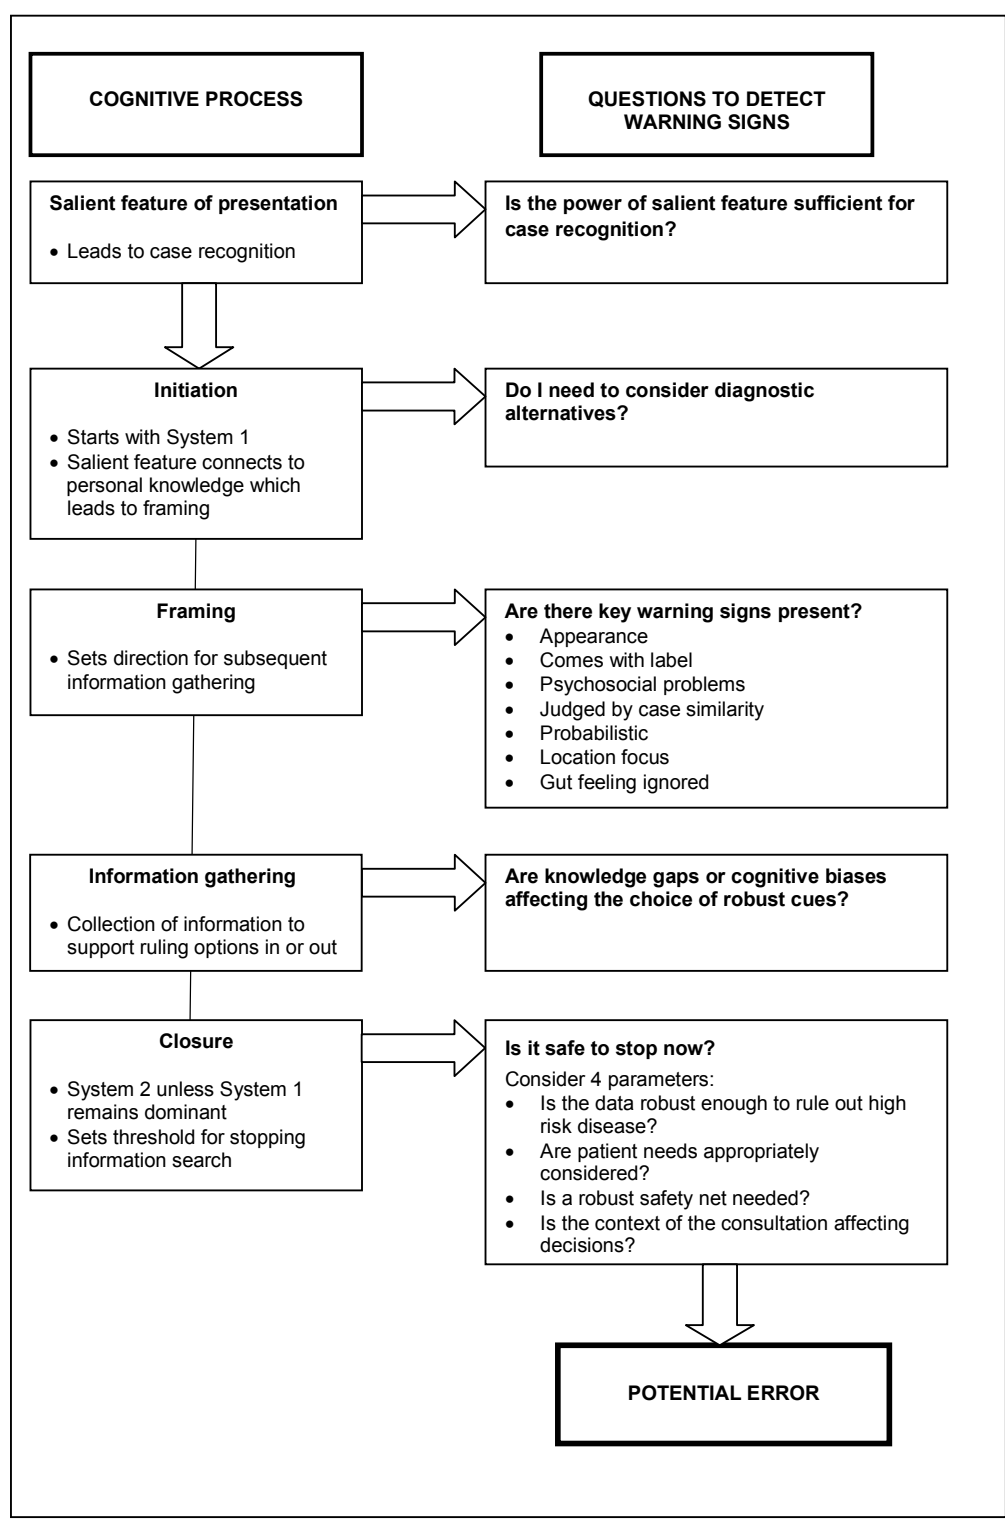

Figure 1. Questions to relate potential sources of error to cognitive process: Anatomy of diagnostic error

## COREQ guidelines table

| Domain 1:<br>Research team<br>and reflexivity |                                          |                                                                                                                                                  | Comment                                               |
|-----------------------------------------------|------------------------------------------|--------------------------------------------------------------------------------------------------------------------------------------------------|-------------------------------------------------------|
| Personal<br>Characteristics                   |                                          |                                                                                                                                                  |                                                       |
| 1.                                            | Interviewer/facilitator                  | Which author/s conducted the interview?                                                                                                          | JB                                                    |
| 2.                                            | Credentials                              | What were the researcher's credentials? <i>E.g. PhD, MD</i>                                                                                      | JB:FRCPE, FRACP, MA; CG:BM,BS; MB*: MEduc             |
| 3.                                            | Occupation                               | What was their occupation at the time of the study?                                                                                              | Research Fellows                                      |
| 4.                                            | Gender                                   | Was the researcher male or female?                                                                                                               | 1 male/2 female for analysis                          |
| 5.                                            | Experience and training                  | What experience or training did the researcher have?                                                                                             | >30 years qualitative research JB and MB*, trainee CG |
| Relationship with participants                |                                          |                                                                                                                                                  | Nil                                                   |
| 6.                                            | Relationship established                 | Was a relationship established prior to study commencement?                                                                                      | With some of them                                     |
| 7.                                            | Participant knowledge of the interviewer | What did the participants know about the researcher? <i>e.g. personal goals, reasons for doing the research</i>                                  | Broad outlines given .                                |
| 8.                                            | Interviewer characteristics              | What characteristics were reported about the interviewer/facilitator? <i>e.g. Bias, assumptions, reasons and interests in the research topic</i> | Reasons for research and interest in training         |
| <b>Domain 2: study design</b>                 |                                          |                                                                                                                                                  |                                                       |
| Theoretical framework                         |                                          |                                                                                                                                                  | Dual theory of cognition                              |

## COREQ guidelines table

|                       |                                       |                                                                                                                                                                    |                                                                      |
|-----------------------|---------------------------------------|--------------------------------------------------------------------------------------------------------------------------------------------------------------------|----------------------------------------------------------------------|
| 9.                    | Methodological orientation and Theory | What methodological orientation was stated to underpin the study?<br><i>e.g. grounded theory, discourse analysis, ethnography, phenomenology, content analysis</i> | Content analysis                                                     |
| Participant selection |                                       |                                                                                                                                                                    |                                                                      |
| 10.                   | Sampling                              | How were participants selected?<br><i>e.g. purposive, convenience, consecutive, snowball</i>                                                                       | Convenience                                                          |
| 11.                   | Method of approach                    | How were participants approached? <i>e.g. face-to-face, telephone, mail, email</i>                                                                                 | Email and face-to-face                                               |
| 12.                   | Sample size                           | How many participants were in the study?                                                                                                                           | 15                                                                   |
| 13.                   | Non-participation                     | How many people refused to participate or dropped out? Reasons?                                                                                                    | 60% of those approached not interviewed for lack of time or interest |
| Setting               |                                       |                                                                                                                                                                    |                                                                      |
| 14.                   | Setting of data collection            | Where was the data collected?<br><i>e.g. home, clinic, workplace</i>                                                                                               | Clinic for most, 32at home                                           |
| 15.                   | Presence of non-participants          | Was anyone else present besides the participants and researchers?                                                                                                  | No                                                                   |
| 16.                   | Description of sample                 | What are the important characteristics of the sample? <i>e.g. demographic data, date</i>                                                                           | All experienced GPs in active clinical practice                      |
| Data collection       |                                       |                                                                                                                                                                    |                                                                      |
| 17.                   | Interview guide                       | Were questions, prompts, guides provided by the authors? Was it pilot tested?                                                                                      | Pilot tested. Semi-structured interview                              |
| 18.                   | Repeat interviews                     | Were repeat interviews carried out? If yes, how many?                                                                                                              | No                                                                   |

## COREQ guidelines table

|                                        |                                |                                                                                                                                          |                                     |
|----------------------------------------|--------------------------------|------------------------------------------------------------------------------------------------------------------------------------------|-------------------------------------|
| 19.                                    | Audio/visual recording         | Did the research use audio or visual recording to collect the data?                                                                      | Audiotaped                          |
| 20.                                    | Field notes                    | Were field notes made during and/or after the interview or focus group?                                                                  | Yes                                 |
| 21.                                    | Duration                       | What was the duration of the interviews or focus group?                                                                                  | 30 minutes                          |
| 22.                                    | Data saturation                | Was data saturation discussed?                                                                                                           | Yes and reached at about 2/3 of way |
| 23.                                    | Transcripts returned           | Were transcripts returned to participants for comment and/or correction?                                                                 | No                                  |
| <b>Domain 3: analysis and findings</b> |                                |                                                                                                                                          |                                     |
| Data analysis                          |                                |                                                                                                                                          |                                     |
| 24.                                    | Number of data coders          | How many data coders coded the data?                                                                                                     | 3: JB, JG, MB                       |
| 25.                                    | Description of the coding tree | Did authors provide a description of the coding tree?                                                                                    | yes                                 |
| 26.                                    | Derivation of themes           | Were themes identified in advance or derived from the data?                                                                              | Both, as we responded to the data   |
| 27.                                    | Software                       | What software, if applicable, was used to manage the data?                                                                               | NVivo                               |
| 28.                                    | Participant checking           | Did participants provide feedback on the findings?                                                                                       | yes                                 |
| Reporting                              |                                |                                                                                                                                          |                                     |
| 29.                                    | Quotations presented           | Were participant quotations presented to illustrate the themes / findings? Was each quotation identified? e.g. <i>participant number</i> | yes                                 |

## COREQ guidelines table

|     |                              |                                                                        |     |
|-----|------------------------------|------------------------------------------------------------------------|-----|
| 30. | Data and findings consistent | Was there consistency between the data presented and the findings?     | yes |
| 31. | Clarity of major themes      | Were major themes clearly presented in the findings?                   | yes |
| 32. | Clarity of minor themes      | Is there a description of diverse cases or discussion of minor themes? | yes |

\* MB refers to Margaret Balla identified in Acknowledgements

## Appendix 1

**Appendix 1: List of interview questions****Q 1: to gain insights into participants' conceptualisations of a diagnostic error.**

*What do you regard as a diagnostic error?*

**Q 2: to describe themes of errors in relation to the cognitive model we used.**

*If you are comfortable, can you tell me about some errors that you have made?*

GPs would then describe an error they made or were closely involved with. This spontaneous response generally covered a clear sequence of the salient features of the case, the context in which it occurred, their analysis of why and where they went wrong and the outcome. They often added remarks about what they learned from it and how they thought they changed their practice as a consequence, with more experience or working in a different environment.

**Q 3: Clarifying questions**

These were used only if more details were needed and were open-ended. Occasional questions used to clarify terminology.

**Q 3.1. : Examples of clarifying questions about framing**

*How do you deal with this sort of undifferentiated, I know there's something but I don't know what it is?*

*So what did you sort of think was the problem? Why do you think it happened?*

**Q 3.2. : Examples of clarifying questions about effect of biases**

*People often talk about getting stuck on the first thing which is what you just said, can you tell me how you manage that because it must be a common issue?*

*So why do you think that happened?*

*You often use the term 'red flag' which you just used, what do you mean by that?*

**Q 3.3. : Examples of clarifying questions about closure thresholds**

*So this issue of confidence, how do you deal with that .. so how do you have a threshold of confidence that you say "stop now",*

*But what makes you feel, do you think, that "I'm not worried you"? What is it?*

*Can I just ask you a question about finishing the consultation? What do you hope to achieve before you're willing to do it.*

*Could you sort of speculate on the idea of a level of confidence that you have in your diagnoses?*

*One of the problems people describe is when to stop looking for things like and where do you stop?*

1  
2  
3 **Title:** Identifying early warning signs for diagnostic errors in primary care: a qualitative  
4 study.  
5

6 **Corresponding author :**

7 John Balla

8 Centre for Evidence-based Medicine

9 Department of Primary Health Care

10 University of Oxford

11 2nd Floor, 23-38 Hythe Bridge Street, Oxford OX1 2ET, UK.

12 email: john.balla @phc.ox.ac.uk

13 Tel: + 44 (0)1865 289288

14 Fax: + 44 (0)1865 289287

15  
16  
17  
18  
19  
20  
21  
22  
23 **Co-authors**

24  
25  
26 **Carl Heneghan**, Centre for Evidence-based Medicine, Department of Primary  
27 Health Care, University of Oxford, Oxford, UK.

28  
29  
30 **Clare Goyder**

31 Centre for Evidence-based Medicine, Department of Primary Health Care,

32 University of Oxford, Oxford, UK.

33  
34  
35  
36 **Matthew Thompson**, Department of Primary Health Care, University of Oxford,  
37 Oxford, UK.

38  
39  
40  
41 **Keywords**

42 diagnostic error; clinical reasoning; professional development; primary care,  
43 clinical decision making

44  
45  
46  
47  
48 **Word count:** 3844



## Abstract

**Objective** We investigate the mechanisms of diagnostic error in primary care consultations to detect warning signs for possible error. We aim to identify places in the diagnostic reasoning process associated with major risk indicators.

**Design** A qualitative study using semi-structured interviews with open-ended questions.

**Setting** A two-month study in primary care conducted in Oxfordshire, UK. **Participants** We approached about 25 experienced General Practitioners by email or word of mouth, 15 volunteered for the interviews and were available at a convenient time.

**Intervention** Interview transcripts provided 45 cases of error. Three researchers searched these independently for underlying themes in relation to our conceptual framework.

**Outcome measures** Locating steps in the diagnostic reasoning process associated with major risk of error and detecting warning signs that can alert clinicians to increased risk of error.

**Results** Initiation and closure of the cognitive process are most exposed to risk of error. Cognitive biases developed early in the process lead to errors at the end. These warning signs can be used to alert clinicians to the increased risk of diagnostic error. Ignoring red flags or critical cues was related to processes being biased through

1  
2  
3 the initial frame, but equally well, it could be explained by knowledge  
4 gaps.  
5  
6  
7

8  
9  
10 Conclusions Cognitive biases developed at the initial framing of the  
11 problem relate to errors at the end of the process. We refer to these  
12 biases as warning signs that can alert clinicians to the increased risk  
13 of diagnostic error. We conclude that lack of knowledge is likely to be  
14 an important factor in diagnostic error. Reducing diagnostic errors in  
15 primary care should focus on early and systematic recognition of  
16 errors including near misses, and a continuing professional  
17 development environment that promotes reflection in action to  
18 highlight possible causes of process bias and of knowledge gaps.  
19  
20  
21  
22  
23  
24  
25  
26  
27  
28  
29  
30  
31

## 32 Introduction

33  
34 Diagnostic error has been defined 'as a diagnosis that was unintentionally  
35 delayed (sufficient information was available earlier), wrong (another diagnosis  
36 was made before the correct one), or missed (no diagnosis was ever made)'. [1]  
37 Now, generally referred to misdiagnosis, missed diagnosis, or delayed diagnosis.  
38 [2, 3]  
39  
40  
41  
42  
43

44 These definitions have also been refined to emphasise the 'longitudinal aspect of  
45 diagnosis', where a precise diagnosis need not be made, or it can wait, 'because  
46 other decisions may take priority'. [4] The relative importance of diagnostic  
47 errors to the widespread health problem of medical errors in general is unclear,  
48 yet several US sources suggest that they are a major contributor. [5] A  
49 systematic review of diagnostic error in primary care in the UK quoted diagnostic  
50 error accounts for the greatest proportion of medical malpractice claims against  
51 GPs (63%). [6] An analysis of 1000 claims of GPs in the UK identified 631  
52  
53  
54  
55  
56  
57  
58  
59  
60

1  
2  
3 alleged delayed diagnoses. [7] A New Zealand review of primary care claims  
4 showed that delays in diagnosis were few, but associated with a disproportionate  
5 number of serious and sentinel injuries (16%) and deaths (50%). [8] Studies of  
6 diagnostic error outside of insurance claims generally focus on hospital  
7 populations and specialties. [9] A recent review quotes a diagnostic error rate of  
8 between 5 and 15%, depending on the specialty and methods of data collection.  
9 [10]

16  
17 Several commentators have noted the importance of attempting to reduce  
18 diagnostic error by understanding in more depth the cognitive reasoning  
19 processes underlying diagnostic decision making. [11] Winters et al [12] noted  
20 that any attempts to improve diagnostic safety must 'intuitively support how our  
21 brains work rather than how we would like them to work.' Norman [13] noted the  
22 potential importance of reflecting on the clinician's 'own performances and  
23 identify places where their reasoning may have failed'. Indeed, Elstein [11]  
24 suggested that a major objective for improving cognitive reasoning in future  
25 research should include delineating how feedback on clinical reasoning could be  
26 used to "guide clinicians to identify priority tasks for reducing diagnostic errors?".  
27 Ely et al [4] propose that one method for doing this could be to identify those red  
28 flags 'that should prompt a time-out' as a priority for the study of diagnostic error.  
29  
30  
31  
32  
33  
34  
35  
36  
37  
38

39  
40 The literature suggests that clinicians should reflect on their performance to  
41 identify places where their reasoning may be most at risk of failing. This needs to  
42 be based on how we actually think rather than how so called rational models  
43 work. We need to organise the relevant principles of cognitive psychology in  
44 ways that are useful to alert clinicians to possible cognitive bias and emphasise  
45 during the training process. These alerts to possible biases may then guide the  
46 clinical reasoning process to reflection. We have previously suggested the  
47 model of the Dual Theory of Cognition (DTC) as a framework to explore  
48 diagnostic reasoning in primary care. This identifies high risk places in the  
49 diagnostic reasoning process where the clinician is most likely to commit an error  
50 is consistent with our objective. [14] In this study we investigate the mechanisms  
51  
52  
53  
54  
55  
56  
57  
58  
59  
60

of diagnostic error in primary care clinical practice using qualitative methods with a well-defined cohort and a strong theoretical base.

## Methods

### Design

Semi-structured interviews using open-ended questions were based on a model of clinical reasoning derived from the DCT. The DCT is a generally accepted model of human cognition that encompasses an initial fast response to a problem (System 1) that occurs at a subconscious level and is associated with or followed by a slow analytic, reflective response (System 2). [15] The initial response is based on [16] a mental construct made up of the individual's interpretation of past experience, understanding of theories of professional knowledge, value judgments and the social context. Initial judgments based on these pre-existing constructs in relation to the context of the new case, lead to the construction of a frame [17] that limits and gives direction to the rest of the cognitive process. [18]

The initiation of the process is largely in the domain of System 1, at a subconscious level. At the other end of the process, closure may occur with minimal or no exposure to System 2 if the dominance of System 1 is overwhelming. In other cases, closure rules, [19] dependent on the context, would be used as consistent with System 2. The literature on diagnostic error describes these as frequently occurring at initiation, but most often at closure and that both Systems 1 and 2 may be involved. [4] It is the congruence of the DTC with what we know about clinical reasoning that leads us to use it as the model for this study.

### Participants

Primary care clinicians (known as General Practitioners or GPs in the UK) were asked to first define diagnostic error and then discuss such cases from their practice. 15 GPs (>5 year in practice) working in primary care in Oxfordshire, provided 45 cases. The model highlights key areas of knowledge and critical

1  
2  
3 value judgments that are used in the clinical encounter that provide the questions  
4 for our interviews. These are described in Appendix 1.  
5  
6  
7

## 8 9 **Analysis**

10 Three researchers searched the text independently for underlying themes in  
11 relation to our conceptual framework. Categories were coded according to  
12 emerging themes and added to or changed as new concepts emerged. [20]  
13 Differences in interpretation were discussed and consensus was reached on  
14 clustering to common themes. Direct quotes from the interviews appear in italics,  
15 numerics preceded by G are interview identifiers.  
16  
17  
18  
19  
20  
21  
22

## 23 **Results**

24  
25  
26 Participants indicated that our questions were easy to follow and most  
27 commented that they enjoyed the interview as a good way to reflect on practice.  
28  
29

### 30 **Definitions of diagnostic error**

31  
32  
33 The definitions of diagnostic error provided by respondents were consistent with  
34 previous definitions. Over half of the 45 cases analysed were associated with the  
35 clinician focusing on a single diagnosis from presentation to closure of the  
36 cognitive process. Respondents divided errors into *two different categories*  
37 (*G12*): Firstly the wrong diagnostic label consisting of a *diagnosis that's wrong or*  
38 *proven to be wrong by yourself or someone else at a later date (G3)*, and  
39 secondly delayed diagnosis described as *missed the boat you should have done*  
40 *something but you didn't (G2)*.  
41  
42  
43  
44  
45  
46  
47

48 GPs raised two issues that caused difficulties in defining an error, namely  
49 variation in how to deal with the severity of the impact of the error: *I rarely give*  
50 *someone a firm diagnosis... it would be an error if there was something serious*  
51 *and I had told someone [ it] wasn't (G8)*, and also what constitutes unacceptable  
52 delay given that *lots of what we see is at low prevalence and evolving, so at the*  
53  
54  
55  
56  
57  
58  
59  
60

1  
2  
3 *very front end it's very vague so actually most of that by definition should be*  
4 *delayed (G1).*  
5  
6  
7

## 8 **The process of clinical reasoning in relation to diagnostic error**

9

10 Results are reported with reference to the 45 cases and not individual GPs. The  
11 cohort provided sufficient data for a case by case analysis of errors, but not for  
12 comparing across the 15 GPs, though there were no indications of differing  
13 themes between individuals. The themes identified divided into two main groups:  
14 initiation and setting the initial diagnostic frame, followed by stopping the search  
15 for further clinical information and achieving diagnostic closure. Additional  
16 themes which emerged are also discussed.  
17  
18  
19  
20  
21  
22  
23  
24

### 25 **Initiation and setting the initial diagnostic frame**

26

27 Salient features link the individual clinician's personal knowledge of similar cases  
28 to the new presentation. A number of themes emerged from our analysis to  
29 shape the frame for the new case in its specific context. In most cases GPs  
30 formed instantaneous diagnoses. For example, the patient's appearance, -  
31 *thought actually looked OK for a first child (G19), or, she didn't sound too unwell*  
32 *over the phone (G9) - before other information was available, provided a*  
33 *powerful bias for framing the case. In over 2/3 (31/45) of cases the focus was on*  
34 *a single diagnosis, in about half of these based on presentation with a pre-*  
35 *existing diagnostic label (16/31). Box 1 reconstructs such a case.*  
36  
37  
38  
39  
40  
41  
42  
43

### 44 **Box 1 here**

45

46  
47 The patient's history of previous psychosocial problems or abnormal behaviour,  
48 were predominant at this stage of the presentation: *previous consultation which*  
49 *had set her up as a particular kind of person (4).* Other salient features led GPs  
50 to instant recognition of a diagnosis or a limited number of differentials. For  
51 instance, *just focusing on the vomiting (39), made the GP think of a gastric*  
52 *problem and delayed the diagnosis of an obstructed hernia. Wrong localisation*  
53  
54  
55  
56  
57  
58  
59  
60

1  
2  
3 framed the cognitive process and biased further information gathering, directly  
4 impacting on diagnostic closure thresholds.  
5  
6

7  
8 Participants made repeated references to needing to focus on the natural history  
9 of disease and expected response to treatment. For instance in referring to a  
10 case of missed cancer: *people that have haemorrhoids that respond beautifully*  
11 *to treatment and have no other symptoms we don't tend to think, oh have they*  
12 *got a colonic cancer (14). Or, the need for experience: *lacked experience at that**  
13 *time [to] potential of this case....and work on the possible diagnosis (9). Most of*  
14 *these references to experience were suggestive of knowledge gaps rather than*  
15 *cognitive error only. Further examples of biases arising from the initial framing*  
16 *appear in Table 1.*  
17  
18  
19  
20  
21  
22  
23

24 **Table 1 here**

### 25 26 27 **Conditions and thresholds for diagnostic closure**

28  
29  
30 Participants did not use numerical criteria to describe the thresholds they used to  
31 decide when to stop searching for more clinical information. Nor did they express  
32 confidence in their decisions this way. When pressed, some responded in terms  
33 such as: *the test would exclude X in 70% of cases, or I was more than 80%*  
34 *certain that I excluded Y, but the basis for these numerical values was very*  
35 *unclear. Since we felt that a number of participants found these questions*  
36 *judgmental, we therefore dropped them as the interview schedule progressed.*  
37  
38  
39

40  
41  
42  
43 A number of GPs raised safety netting spontaneously, or in response to our  
44 questions, related to diagnostic closure. It soon became apparent that  
45 recollections were hazy and they were unsure whether they actually used safety  
46 netting, or just thought that they should have. Therefore we do not include safety  
47 netting in our analysis, recognising its importance as a potential cause of error.  
48  
49  
50

51  
52  
53 The decisions made at closure were affected by biases from the setting of the  
54 initial frame, effectively impeding the reflective System 2 review expected at this  
55  
56  
57  
58  
59  
60

1  
2  
3 stage. Box 32 is a reconstruction of such a case to provide insights into how the  
4 relationship between biases formed at initiation may affect decisions at closure.  
5  
6

### 7 8 **Box 2 here**

9  
10 Other themes related to diagnostic errors after ignoring or misinterpreting the  
11 predictive value of critical information coming from the patient, as did ignoring  
12 'gut feelings'. [21] Other respondents noted the need to be circumspect when  
13 responding to patient needs, including poor outcome with a patient who did not  
14 wish to follow advice: *had a cruise booked and he chose to cancel the*  
15 *appointment and go on the cruise (15)*. Some GPs raised issues about their own  
16 behaviours: *one's own state of confidence or call it what you want competence*  
17 *confidence arrogance or risk taking or not risk caution all play in the actual what*  
18 *you decide to do (12); I'm right at one end of low referrers (43)*. Contextual  
19 factors were often raised as contributing to faulty decisions: *do I want to send a*  
20 *frail, elderly lady up to the hospital on a Friday afternoon when it would be*  
21 *mayhem (34)*; explaining a missed diagnosis: *we were really busy and I think*  
22 *they came in as an emergency (39)*. Table 2 provides examples of biases  
23 affecting thresholds for ruling disease in or out.  
24  
25  
26  
27  
28  
29  
30  
31  
32  
33  
34  
35  
36  
37  
38  
39  
40

## 41 **Discussion**

### 42 **Main findings**

43 The findings of this study identify the initiation and closure of the cognitive  
44 process in the clinical consultation as those most exposed to risk of diagnostic  
45 error. Initiation is a critical step as it sets the frame for subsequent information  
46 search, whereas closure occurs when thresholds for stopping the search have  
47 been met. We show that cognitive biases developed at framing appear to relate  
48 directly to errors at the end of the process. We refer to these as warning signs  
49 (Table 2), as we believe they can be used to alert the clinician to the increased  
50 risk of diagnostic error. Previous studies [4] have also highlighted these two  
51 steps as the points where most cognitive errors occur. However, our findings  
52  
53  
54  
55  
56  
57  
58  
59  
60



1  
2  
3  
4 build on these, providing insights into the underlying sources of the biases that  
5 made the process go wrong. This is consistent with Wearth and Nemeth's [17]  
6 observation that '[we] do not learn much by asking why the way a practitioner  
7 framed the problem turned out to be wrong. We do learn when we discover why  
8 that framing seemed so reasonable at the time'.  
9

10  
11  
12  
13 The initial process of framing a new case is mostly subconscious, and occurs  
14 within the domain of System 1 of the dual theory of cognition (instant, fast  
15 response). The salient feature of the case leads to recognition of similar cases,  
16 and framing is modulated by constructs from experience, knowledge, values and  
17 social context. [22] If there is no instant recognition, System 2 (slow, analytic  
18 thinking) may be engaged, but this may consist of no more than gut feelings. [21]  
19 In the cases analysed here, there was a dominant focus on a single diagnosis. It  
20 is likely that other options were also entertained but forgotten by interviewees.  
21 The most significant biases occurring at this stage related to patients with pre-  
22 existing diagnostic labels and those with underlying psychosocial problems  
23 (Table 1). Ignoring red flags or critical cues may have been related to processes  
24 being biased through the frame, but equally well, they could be explained by lack  
25 of knowledge of the significance of these clinical features.  
26  
27

28  
29 We have previously suggested [23] that the informal 'rules' that clinicians use to  
30 cease their search for further clinical features during a consultation (i.e. stopping  
31 rules for diagnostic closure) involved three criteria: (i) high risk conditions have  
32 been excluded and other options appropriately ruled in; (ii) there was a direct  
33 response to the patient's needs; (iii) there was a reliable safety net in place. As a  
34 result of the biases we describe based on our current findings, it appears that in  
35 some cases red flags and critical cues suggesting alternative diagnoses were  
36 ignored or misinterpreted. The focus was on ruling in early diagnoses, rather than  
37 the usually preferred option of ruling hazardous conditions out first. This is  
38 consistent with System 1 being dominant, ignoring the reflective System 2. We  
39 found that ignoring or failing to search for important cues may be due to  
40 knowledge gaps or biased reasoning processes. Participants' frequent reference  
41  
42  
43  
44  
45  
46  
47  
48  
49  
50  
51  
52  
53  
54  
55  
56  
57  
58  
59  
60

1  
2  
3 to 'not being experienced' suggests knowledge gaps contributing to a number of  
4 errors. For these reasons, and contrary to much of the literature (with the  
5 exception of Norman and Eva [10] ), we therefore conclude that lack of  
6 knowledge is indeed likely to be an important factor in diagnostic error.  
7  
8  
9

10  
11 Finally, we found that participants did not use numerical values as thresholds for  
12 stopping the collection of more clinical data. We hypothesize that this relates to  
13 the complexity of these judgments: needing to satisfy decision rules based  
14 largely on subjective inputs. Firstly, the clinician needs to take into account the  
15 basis of ruling disease in or out. Most early formulations are at least partly based  
16 on System 1 knowledge and have a tendency to bias unless one takes time for  
17 reflection through the influence of System 2. Robust data for predictive values  
18 may not exist or not be powerful enough to lead to safe closure. Secondly,  
19 assessing the values and individual needs of patients in the context of an illness  
20 are subjective. Thirdly, confidence levels in a safety net may not be reliable, yet  
21 confidence in safe closure must be closely dependent on confidence in the  
22 quality of the net. [23]  
23  
24  
25  
26  
27  
28  
29  
30  
31  
32

33 If we add to these issues the impact of the context or environment on the  
34 clinician's decision making [24] and willingness or ability to involve System 2, it  
35 becomes apparent why Bayesian and similar 'rational' approaches are not the  
36 norm. It comes as no surprise when one of our GPs refers to closure as it *feels*  
37 *like a nebulous thing*. [23] We believe that clinicians use individualised and often  
38 tacit guides for how to deal with the problem and other '*multifarious factors that*  
39 *come into reckoning when making decisions*.' [22] With this package they then  
40 make judgments, described by Polanyi [16] writing about personal knowledge: '*in*  
41 *respect of choices made in the exercise of personal judgment ....there is always*  
42 *a range of discretion open in a choice.... In view of the unspecifiability of the*  
43 *particulars on which such a decision will be based, it is heavily affected by the*  
44 *participation of the person pouring himself into these particulars and may in fact*  
45 *represent a major feat of his originality,*' and concludes that '*valid choices can be*  
46 *made by submitting to one's own sense of responsibility*'. This last statement  
47  
48  
49  
50  
51  
52  
53  
54  
55  
56  
57  
58  
59  
60

1  
2  
3 sums up the core of professionalism, where we expect a deep sense of  
4 responsibility from the decision maker.  
5  
6

7  
8 So, what can we offer to reduce error? In an ideal world clinicians would have  
9 robust clinical data with high true positive and negative characteristics. This could  
10 then be used to develop decision aids, as suggested by Buntinx et al. [25]  
11 However, such information is scarce and there would still be a great deal of  
12 subjective judgment to be made. Providing indicators of early warning signs  
13 where errors may occur in the diagnostic process may help to prompt a reflective  
14 review of the cognitive process. We need to look at ways of presenting this as an  
15 integral part of the clinical process. This approach may then become part of the  
16 ongoing continual professional development for clinicians. Figure 1, based on our  
17 results is a summary of how warning signs may be incorporated in a practice  
18 environment to constructively promote reflection in practice.  
19  
20  
21  
22  
23  
24  
25  
26

27  
28 **Figure 1 here**  
29

### 30 **Strengths and limitations of the study**

31  
32 We designed the study to be consistent with desired future directions as outlined  
33 in the introduction. It is based on a strong theoretical framework provided by the  
34 DTC. The strength of this model is not only that it 'intuitively supports how our  
35 brains work', [12] but particularly that the initiation of the process is consistent  
36 with System 1 working at a subconscious level. Our interviews explore what is  
37 salient in a presentation [26] and show how initial biases influence the diagnostic  
38 process. We identify warning signs on the way, alerting clinicians to risk of error.  
39 [4] These may have the potential to reduce diagnostic error. [11]  
40  
41  
42  
43  
44  
45  
46  
47

48  
49 Limitations relate to three main issues. First, sampling: participants were not  
50 chosen at random but consisted of self-selected individuals made up of more  
51 than half of the cohort we approached. This is an almost universal problem with  
52 studies that involve busy and senior clinicians. Our research needs to be  
53 replicated in other settings in the UK or in countries with different health systems,  
54 or with other specialties. However, given that our findings are consistent with  
55  
56  
57  
58  
59  
60

1  
2  
3 other studies with different methodologies and use a strong theoretical base the  
4 results are likely to have a degree of generalisability. Second, hindsight bias:  
5 clinicians generally become aware of errors after an event and the information  
6 may be fragmentary. They construct a narrative based on hindsight, ending up  
7 with 'illusions that one has understood the past'. [15] In the construction of the  
8 narrative, hindsight bias converts events 'into a coherent causal framework'.  
9 [17] Occurring at a subconscious level, the bias is inevitable and all previous  
10 studies of error were tainted by it. We therefore attempted to minimise these  
11 limitations by examining the clinicians in real life situations rather than a  
12 laboratory, and avoiding data that was collected for other reasons (e.g. litigation),  
13 [17] interviews tried to reconstruct the context in which error took place. Third, we  
14 do not have evidence that alerts such as the warning signs we propose will  
15 reduce diagnostic errors in clinical practice. Similarly, deliberate practice [27] has  
16 not been shown to be successful in non-procedural specialities but in view of its  
17 success in procedural clinical settings, would be a strong contender to be  
18 explored [4]

### 33 **Implications for practice**

34  
35  
36 There are two prerequisites for change. 1) Early and systematic recognition of  
37 errors including near misses: this could be achieved through regular, non-  
38 threatening, in-practice audits or significant event analyses. Without this it will not  
39 be possible to reduce hindsight bias. 2) Provision of a clinical environment that  
40 promotes reflection in action to detect the causes of process bias and knowledge  
41 gaps. This may be more feasible when working in a group of trusted peers and  
42 using methods such as incident reviews and journal meetings focused on recent  
43 errors as a way of reviewing the diagnostic reasoning processes as well as  
44 knowledge gaps. Since reflection will need to focus both on the cognitive process  
45 and evidence based diagnosis resources, it would be important to have meetings  
46 facilitated by a trained, preferably internal GP.

### 56 **Implications for future research**

1  
2  
3 We do not know if the practice changes that we propose will lead to better clinical  
4 care and this needs separate evaluation. To explore the generalisability of our  
5 findings we need to replicate this study in groups of clinicians in other specialties  
6 and settings. Future studies will need to deal with cases closer to the event and  
7 place even more emphasis on context. The model of deliberate practice [27] is  
8 likely to be suitable for ongoing professional development and training to reduce  
9 error. Some of these have led to improved clinical care, albeit in interventional  
10 specialties, which suggests that similar improvements might be feasible in  
11 primary care, but this needs evaluation.  
12  
13  
14  
15  
16  
17  
18  
19

## 20 **Conclusions**

21  
22 Initiation and closure of the cognitive process are most exposed to the risk of  
23 diagnostic error in primary care. Cognitive biases developed at framing directly  
24 influence errors at the end of the process. We refer to these as warning signs  
25 that can alert clinicians to the increased risk of diagnostic error. The most  
26 significant reasoning biases we observed related to patients presenting with pre-  
27 existing diagnostic labels and psychosocial problems. Others included the use of  
28 heuristics, patient's appearance, wrong initial localisation of the problem and  
29 probabilistic bias. Subsequently ignored red flags or critical cues may have been  
30 related to biased process through the frame, but could also be explained by  
31 knowledge gaps.  
32  
33  
34  
35  
36  
37  
38  
39

40 We conclude that lack of knowledge is likely to be an important factor in  
41 diagnostic error. Reducing diagnostic errors in primary care should focus on early  
42 and systematic recognition of errors including near misses, and a continuing  
43 professional development environment that promotes reflection in action to  
44 highlight possible causes of process bias and of knowledge gaps. Alerting  
45 clinicians to warning signs of where there is an increased risk of error may be one  
46 way to prompt a reflective review of the cognitive process. For this to become an  
47 integral part of the clinical process, we may need to experiment with deliberate  
48 practice of looking for warning signs as a potential method of professional  
49 development to reduce error.  
50  
51  
52  
53  
54  
55  
56  
57  
58  
59  
60

## References

1. Graber ML, Franklin N, Gordon R. Diagnostic error in internal medicine. *Arch Intern Med* 2005; 165: 1493-1499.
2. Schiff GD, Hasan O, Kim S et al., Diagnostic error in medicine: analysis of 583 physician-reported errors. *Arch Intern Med* 2009; 169: 1881-1887.
3. Singh H, Thomas EJ, Khan MM et al. Identifying diagnostic errors in primary care using an electronic screening algorithm. *Arch Intern Med* 2007; 167: 302-308.
4. Ely JW, Graber ML, Croskerry P. Checklists to reduce diagnostic errors. *Acad Med* 2011; 86:307-313.
5. Jena AB, Seabury S, Lakdawalla D et al. Malpractice risk according to physician specialty. *N Engl J Med* 2011; 365: 629-636.
6. Kostopoulou O, Delaney BC, Munro CW. Diagnostic difficulty and error in primary care--a systematic review. *Fam Pract* 2008; 25: 400-13.
7. Silk, N., An Analysis of 1000 Consecutive General Practice Negligence Claims. *Medical Protection Society* 2000; 1-18.
8. Wallis K, Dovey S. No-fault compensation for treatment injury in New Zealand: identifying threats to patient safety in primary care. *BMJ Qual Saf* 2011; 20: 87-91.
9. Schiff GD, Kim S, Abrams R et al. Diagnosing Diagnosis Errors: Lessons from a Multi-institutional Collaborative Project and Methodology 2005; [www.ahrq.gov/downloads/pub/advances/vol2/schiff.pdf](http://www.ahrq.gov/downloads/pub/advances/vol2/schiff.pdf) (sighted 20/08/2011)
10. Norman GR, Eva KW. Diagnostic error and clinical reasoning. *Med Educ* 2010; 44: 94-100.
11. Elstein AS. Thinking about diagnostic thinking: a 30-year perspective. *Adv Health Sci Educ Theory Pract* 2009; 14 S 1: 7-18.
12. Winters BD, Aswani MS, Pronovost PJ. Commentary: Reducing diagnostic errors: another role for checklists? *Acad Med* 2011; 86: 279-281.
13. Norman G. Dual processing and diagnostic errors. *Adv Health Sci Educ Theory Pract*, 2009; 14 S 1: 37-49.
14. Balla JL, Heneghan C, Glasziou P et al. A model for reflection for good clinical practice. *J Eval Clin Pract*, 2009; 15: 964-969.
15. Kahneman D. *Thinking fast and slow*. p21-2. Allen Lane: London, 2011.
16. Polanyi M. *The study of man*. The University of Chicago Press: London, 1959.
17. Wears RL, Nemeth CP. Replacing hindsight with insight: toward better understanding of diagnostic failures. *Ann Emerg Med* 2007; 49: 206-209.
18. Lucchiari C, Pravettoni G. Cognitive balanced model: a conceptual scheme of diagnostic decision making. *J Eval Clin Pract* 2012; 18: 82-88.
19. Gigerenzer G, Goldstein DG. Betting on one good reason: take the best heuristic. , in *Simple Heuristics that Make Us Smart*. , Gigerenzer G, Todd PM, eds: **ABC Research Group. Simple Heuristics that Make Us Smart**.Oxford University Press: New York 1999.
20. Ritchie J, Spencer L. Qualitative data analysis for applied policy research, in *Analysing Qualitative Data*, Bryman A, Burgess RG eds. Routledge: London, 2011.
21. Stolper E, van de Wiell M, van Royen P et al. Gut feelings as a third track in general practitioners' diagnostic reasoning. *J Gen Intern Med*, 2011; 26: 197-203.

- 1  
2  
3  
4  
5  
6  
7  
8  
9  
10  
11  
12  
13  
14  
15  
16  
17  
18  
19  
20  
21  
22  
23  
24  
25  
26  
27
22. Gabbay J, LeMay A. Practice-Based Evidence for Healthcare Routledge:Abingdon, 2011.
23. Balla J, Heneghan C, Thompson M et al. Clinical decision making in a high-risk primary care environment: a qualitative study in the UK. *BMJ Open*, 2012. 2: p. e000414.
24. Berner ES. Mind wandering and medical errors. *Med Educ* 2011; 45: 1068-1069.
25. Buntinx F, Mant D, van den Bruel A et al., Dealing with low-incidence serious diseases in general practice. *Br J Gen Pract* 2011. 61: 43-6.
26. Kahneman D. Maps of bounded rationality: a perspective on intuitive judgment and choice 2002. Available from: [http://nobelprize.org/nobel\\_prizes/economics/laureates/2002/kahnemann-lecture.pdf](http://nobelprize.org/nobel_prizes/economics/laureates/2002/kahnemann-lecture.pdf) (sighted 8/May/2012).
27. Ericsson KA. Deliberate practice and the acquisition and maintenance of expert performance in medicine and related domains. *Acad Med*, 2004; 79(Suppl 10): S70-81.

28  
29  
30  
31  
32  
33  
34  
35  
36  
37  
38  
39  
40  
41  
42  
43  
44  
45  
46  
47  
48  
49  
50  
51

**Box 1. Case 27: Illustration of initiation of the process and setting the initial diagnostic frame.**

| Reconstruction                                                                                                                                                                                                                                                                                                                                                                                                                                                                                                                                                                                                                                                                                                                                                                                                                                       | Analysis                                                                                                                                                                                                                                                                                                       |
|------------------------------------------------------------------------------------------------------------------------------------------------------------------------------------------------------------------------------------------------------------------------------------------------------------------------------------------------------------------------------------------------------------------------------------------------------------------------------------------------------------------------------------------------------------------------------------------------------------------------------------------------------------------------------------------------------------------------------------------------------------------------------------------------------------------------------------------------------|----------------------------------------------------------------------------------------------------------------------------------------------------------------------------------------------------------------------------------------------------------------------------------------------------------------|
| <p><b>Presentation</b></p> <p><i>Patient in 70's came with breathlessness .. the first thing was he kept saying to me "this is exactly like it was about 6 months previously".. looked back in his notes and 6 months previously he'd been diagnosed with heart failure and so I thought "well, you know" and he was so insistent that it was the same thing... he was a bit breathless but there wasn't anything really obvious going on .. so I thought maybe he was anaemic as well and that had got worse. And it was a Saturday morning so I couldn't easily get any tests straight away so I booked for him to come back first thing on Monday morning for blood tests and ECG and I sent him up to the hospital for a chest x-ray. He was so insistent that it was the same thing and in retrospect that was really misleading for me</i></p> | <p>Salient feature was patient's insistence that the diagnosis was the same as previously, seemingly confirmed by looking at case notes of his previous presentation.</p> <p>System 2 in action as tests ordered, largely to rule in cardiac failure and rule out possible complicating factor of anaemia.</p> |
| <p><b>Context issues</b></p> <p><i>It was a Saturday morning so I couldn't easily get any tests straight away.</i></p>                                                                                                                                                                                                                                                                                                                                                                                                                                                                                                                                                                                                                                                                                                                               | <p>Management affected by practice environment - routine blood tests not immediately available</p>                                                                                                                                                                                                             |

|                                                                                                                                                                                                                                            |                                                                                                                                                                       |
|--------------------------------------------------------------------------------------------------------------------------------------------------------------------------------------------------------------------------------------------|-----------------------------------------------------------------------------------------------------------------------------------------------------------------------|
| <b>Outcome</b><br><i>Next day contacted by one of his friends .. to say "actually, he's had a pulmonary embolism .. he'd got quite a lot worse that afternoon and been admitted to hospital and ..CT showed multiple pulmonary emboli.</i> | Delay in diagnosis likely to System 1 overpowering System 2, raising closure threshold enough to be affected by context issues (no blood tests available at weekend). |
| <b>Summary</b><br>System 1 single diagnosis based on existing label, immediately jumps to the diagnosis. Weak System 2 affected by context issues, delaying diagnosis.                                                                     |                                                                                                                                                                       |

For peer review only



**Table 1. Biases arising from salient features of presentation which initiate the diagnostic process and frame the direction of subsequent information gathering.**

|                                                                                                      |                                                                                                                                                                                                                                                                         |
|------------------------------------------------------------------------------------------------------|-------------------------------------------------------------------------------------------------------------------------------------------------------------------------------------------------------------------------------------------------------------------------|
| <p><b>Previous diagnosis label</b></p>                                                               | <p><i>Because somebody had wrote down that he had bell's palsy and he'd been seen in hospital .. I immediately thought that's what he had (1);</i></p> <p><i>Story of the insect bite and that was what we were sort of using as our diagnostic tool really (6)</i></p> |
| <p><b>Pre existing psychosocial problems</b></p>                                                     | <p><i>all thought some of the bleeding might be from sexual abuse (31);</i></p> <p><i>sick notes, and prescriptions and whatever and I thought that that was probably the main reason behind the um sort of um consultations (37)</i></p>                               |
| <p><b>Reassurance from initial appearance</b></p>                                                    | <p><i>when I called the patient back I got hold of the granny who said oh yes mum's in the shower that as a clue to me meant that maybe the child wasn't that ill (11);</i></p> <p><i>She wasn't terribly unwell (33)</i></p>                                           |
| <p><b>Similarity to a recent case or similarity to representative case built from experience</b></p> | <p><i>My diagnosis was fed by a patient the previous week who'd presented with an ischemic foot (40);</i></p> <p><i>And I thought he had cancer because of the mass and the weight loss and the paleness (44).</i></p>                                                  |
| <p><b>Incorrect localisation of salient features</b></p>                                             | <p><i>vomiting and sweating and diarrhoea .. epigastric pain (10);</i></p> <p><i>epigastric discomfort . . . must be indigestion (20).</i></p>                                                                                                                          |
| <p><b>Common things occurring commonly (Probabilistic reasoning)</b></p>                             | <p><i>viral infections are common (16);</i></p> <p><i>my preconception at the time was that a young &lt;30 year old is very, very unlikely to have bowel cancer (32)</i></p>                                                                                            |
| <p><b>Ignoring as well as over or under estimating red flags or critical cues</b></p>                | <p><i>he came in hopping, which is quite unusual. Not weight bearing at all is quite unusual (30);</i></p> <p><i>normal chest on examination (24)</i></p>                                                                                                               |

|                                                                         |                                                                                                                                                     |
|-------------------------------------------------------------------------|-----------------------------------------------------------------------------------------------------------------------------------------------------|
| <p><b>Vague presenting symptoms, no salient features recognised</b></p> | <p><i>fatigue from whatever cause (3); it was all very vague (28);</i></p> <p><i>atypical leg pain couldn't work out what was going on (21)</i></p> |
|-------------------------------------------------------------------------|-----------------------------------------------------------------------------------------------------------------------------------------------------|

**Box 2. Case 14: Illustration of dominant System 1 impeding System 2 review at closure, leading to error.**

| Reconstruction                                                                                                                                                                                                                                                                                                                                                                                                                                                                                                                                                                                            | Analysis                                                                                                                                                                                                                                          |
|-----------------------------------------------------------------------------------------------------------------------------------------------------------------------------------------------------------------------------------------------------------------------------------------------------------------------------------------------------------------------------------------------------------------------------------------------------------------------------------------------------------------------------------------------------------------------------------------------------------|---------------------------------------------------------------------------------------------------------------------------------------------------------------------------------------------------------------------------------------------------|
| <p><b>Presentation</b></p> <p><i>Elderly patient seen 6 years ago for what appeared to be resolving haemorrhoidal bleed .. 6 months prior [to the most recent visit] described narrow stools like a snake ..[At the present visit] bowel frequency and some bleeding with examination of clear external piles no rectal masses on PR. Did some bloods but wasn't anaemic.</i></p> <p><i>[I ignored] the older the patient the lower the threshold for colorectal cancer that we would have for referring .. red flag that's there for a reason therefore it would be foolish to sort of dismiss..</i></p> | <p>System 1 dominance may explain the high threshold for vigilance in this age group.</p> <p>No significant attempt to rule out and normal Hb wrongly used for rule in. Another example of the power of a perceived label in biasing process.</p> |
| <p><b>Salience</b></p> <p><i>External piles with a normal PR .. [6 years ago] with haemorrhoides seen by a colleague.</i></p>                                                                                                                                                                                                                                                                                                                                                                                                                                                                             | <p>Salient feature was a normal examination 6 years earlier.</p>                                                                                                                                                                                  |
| <p><b>Outcome</b></p> <p><i>2 months after last visit ..change in bowel habit with rectal bleeding and as part of investigation had a sigmoidoscopy and biopsy which found a malignant colonic tumour</i></p>                                                                                                                                                                                                                                                                                                                                                                                             | <p>Delay in diagnosis likely to System1 overpowering System 2, raising closure threshold.</p>                                                                                                                                                     |
| <p><b>Summary</b></p> <p>System 1 single diagnosis based on label immediately jumps to the diagnosis. Ignored expected natural history, and the presence of a red flag. Diagnosis was delayed until new critical cue emerged.</p>                                                                                                                                                                                                                                                                                                                                                                         |                                                                                                                                                                                                                                                   |

**Table 2. Effect of framing biases on closure thresholds for ruling disease in or out.**

|                                                                           |                                                                                                                                                                                                                                                                                                                                                                                                                                                                                                                                                             |
|---------------------------------------------------------------------------|-------------------------------------------------------------------------------------------------------------------------------------------------------------------------------------------------------------------------------------------------------------------------------------------------------------------------------------------------------------------------------------------------------------------------------------------------------------------------------------------------------------------------------------------------------------|
| <p><b>Presents with diagnosis label</b></p>                               | <p><i>I'd keyed in too quickly and then just ignored any of the sort of differential information (1);</i></p> <p><i>When your brain immediately jumps to the obvious diagnosis its worth just having in the back of your mind what else it could be (6)</i></p>                                                                                                                                                                                                                                                                                             |
| <p><b>Psychosocial label/behavioural</b></p>                              | <p><i>I closed it before she came in .. I think hadn't really thought out the differential diagnosis (4);</i></p> <p><i>Not appreciating the seriousness of the, of the problem, coupled with not really wanting to think about it because the patient was so difficult. (31)</i></p>                                                                                                                                                                                                                                                                       |
| <p><b>Ignores red flag</b></p>                                            | <p><i>[did not] take a step back and consider what we call the sort of red flagged ones, are there any flags in front of you that are presenting information of other serious diseases that might kill or harm? (2);</i></p> <p><i>Think I ought to have thought this severe pain which isn't improving I ought to go back to cancer but so I was put off by the negative investigations and that kind of prior assessment and err .. level of pain which was not otherwise explained (15)</i></p>                                                          |
| <p><b>Ignores possibility of serious disease with low probability</b></p> | <p><i>[ignored] older the patient the lower the threshold for particularly for colorectal cancer that we would have for referring .. red flag that's there for a reason therefore it would be foolish to sort of dismiss (14);</i></p> <p><i>My preconception at the time was that a young 28 year old is very, very unlikely to have bowel cancer .... slightly raised C-reactive protein...it wasn't dramatically raised ... I certainly didn't act on it because I think I was confused by the fact he'd got better the second consultation (32)</i></p> |

|                                                             |                                                                                                                                                                                                                                                                                                        |
|-------------------------------------------------------------|--------------------------------------------------------------------------------------------------------------------------------------------------------------------------------------------------------------------------------------------------------------------------------------------------------|
| <b>Used wrong clinical features to rule-out a condition</b> | <i>[ignored] new onset quite severe headache in a (40) something year old is a red flag in itself (22);</i><br><br><i>We think of ectopic pregnancy as being bleeding and pain and this was painless bleeding (17)</i>                                                                                 |
| <b>Ignored gut feelings</b>                                 | <i>it's a sixth sense .. that I think as you gain more experience you really hone and fine tune .. it's invaluable particularly with children 19; was not terribly unwell ... obviously needed more investigations.. wasn't happy with my decision even though it wasn't a conscious process. (33)</i> |

For peer review only

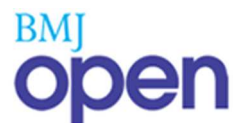

**Identifying early warning signs for diagnostic errors in primary care: a qualitative study**

|                                 |                                                                                                                                                                                                                                                                                              |
|---------------------------------|----------------------------------------------------------------------------------------------------------------------------------------------------------------------------------------------------------------------------------------------------------------------------------------------|
| Journal:                        | <i>BMJ Open</i>                                                                                                                                                                                                                                                                              |
| Manuscript ID:                  | bmjopen-2012-001539.R1                                                                                                                                                                                                                                                                       |
| Article Type:                   | Research                                                                                                                                                                                                                                                                                     |
| Date Submitted by the Author:   | 15-Jul-2012                                                                                                                                                                                                                                                                                  |
| Complete List of Authors:       | Balla, John; University of Oxford, Centre for Evidence-based Medicine<br>Heneghan, Carl; University of Oxford, Centre for Evidence-based Medicine<br>Goyder, Clare; University of Oxford, Centre for Evidence-based Medicine<br>Thompson, Matthew; University of Oxford, Primary Health Care |
| <b>Primary Subject Heading</b>: | Diagnostics                                                                                                                                                                                                                                                                                  |
| Secondary Subject Heading:      | Evidence based practice, General practice / Family practice, Medical education and training                                                                                                                                                                                                  |
| Keywords:                       | EDUCATION & TRAINING (see Medical Education & Training), Risk management < HEALTH SERVICES ADMINISTRATION & MANAGEMENT, PRIMARY CARE, QUALITATIVE RESEARCH, Clinical reasoning, Clinical decision making                                                                                     |
|                                 |                                                                                                                                                                                                                                                                                              |

SCHOLARONE™  
Manuscripts

1  
2  
3 **Title:** Identifying early warning signs for diagnostic errors in primary care: a qualitative  
4 study.  
5

6 **Corresponding author :**

7 John Balla  
8

9 Centre for Evidence-based Medicine  
10

11 Department of Primary Health Care  
12

13 University of Oxford  
14

15 2nd Floor, 23-38 Hythe Bridge Street, Oxford OX1 2ET, UK.  
16

17 email: john.balla @phc.ox.ac.uk  
18

19 Tel: + 44 (0)1865 289288  
20

21 Fax: + 44 (0)1865 289287  
22

23 **Co-authors**

24  
25  
26 **Carl Heneghan**, Centre for Evidence-based Medicine, Department of Primary  
27 Health Care, University of Oxford, Oxford, UK.  
28

29  
30 **Clare Goyder**

31 Centre for Evidence-based Medicine, Department of Primary Health Care,  
32 University of Oxford, Oxford, UK.  
33  
34

35  
36 **Matthew Thompson**, Department of Primary Health Care, University of Oxford,  
37 Oxford, UK.  
38  
39

40  
41 **Keywords**

42 diagnostic error; clinical reasoning; professional development; primary care,  
43 clinical decision making  
44  
45  
46

47  
48 **Word count:** 4005  
49  
50  
51  
52  
53  
54  
55  
56  
57  
58  
59  
60

## Introduction

Diagnostic error has been defined 'as a diagnosis that was unintentionally delayed (sufficient information was available earlier), wrong (another diagnosis was made before the correct one), or missed (no diagnosis was ever made)'.

[1][2, 3]

These definitions have also been refined to emphasise the 'longitudinal aspect of diagnosis', where a precise diagnosis need not be made, or it can wait, 'because other decisions may take priority'. [4] The relative importance of diagnostic errors to the widespread health problem of medical errors in general is unclear, yet several US sources suggest that they are a major contributor. [5] A systematic review of diagnostic error in primary care in the UK quoted diagnostic error accounts for the greatest proportion of medical malpractice claims against GPs (63%). [6] An analysis of 1000 claims of GPs in the UK identified 631 alleged delayed diagnoses. [7] A New Zealand review of primary care claims showed that delays in diagnosis were few, but associated with a disproportionate number of serious and sentinel injuries (16%) and deaths (50%). [8] Studies of diagnostic error outside of insurance claims generally focus on hospital populations and specialties. [9] A recent review quotes a diagnostic error rate of between 5 and 15%, depending on the specialty and methods of data collection. [10]

Several commentators have noted the importance of attempting to reduce diagnostic error by understanding in more depth the cognitive reasoning processes underlying diagnostic decision making. [11] Winters et al [12] noted that any attempts to improve diagnostic safety must 'intuitively support how our brains work rather than how we would like them to work.' Norman [13] noted the potential importance of reflecting on the clinician's 'own performances and identify places where their reasoning may have failed'. Indeed, Elstein [11] suggested that a major objective for improving cognitive reasoning in future research should include delineating how feedback on clinical reasoning could be used to "guide clinicians to identify priority tasks for reducing diagnostic errors?".

1  
2  
3 Ely et al [4] propose that one method for doing this could be to identify those red  
4 flags 'that should prompt a time-out' as a priority for the study of diagnostic error.  
5  
6  
7

8  
9 We have previously suggested a model of the Dual Theory of Cognition (DTC) as  
10 a framework to explore diagnostic reasoning in primary care. This identifies high  
11 risk places in the diagnostic reasoning process where the clinician is most likely  
12 to commit an error is consistent with our objective. [14] In this study we  
13 investigate the mechanisms of diagnostic error in primary care clinical practice  
14 using qualitative methods with a well-defined cohort and a strong theoretical  
15 base.  
16  
17  
18  
19  
20  
21  
22

## 23 **Methods**

24  
25 As indicated in the introduction, the majority of studies of diagnostic error rely on  
26 retrospective reviews of data collected for malpractice claims. A lesser number of  
27 reports deal with hospital incidents and consist of ill defined cohorts. In these  
28 reports a mix of poorly defined methodologies are used. As to what happened  
29 during the actual consultation is rarely understood and by the nature of the data  
30 unavailable. Instead, chart reviewers tend to make personal judgments. A further  
31 confounding problem relates to the unavoidable fact that clinicians may never  
32 find out about their errors and if they do, this could be weeks or months after the  
33 event. These issues will be discussed in more detail in the section on Strengths  
34 and limitations of the study reported here. Our choice of method, relying on  
35 interviews for data collection was made with the aim of getting a little closer to  
36 the truth of what happens when a consultation effectively fails. Knowing the  
37 limitations of the method, our expectation was that this may lead us and hopefully  
38 others, to further fruitful research. We leave discussion of these matters to the  
39 section on Implications for further research, at the end of this paper.  
40  
41  
42  
43  
44  
45  
46  
47  
48  
49  
50  
51  
52  
53

## 54 **Design**

55 Semi-structured interviews using open-ended questions were based on a model  
56 of clinical reasoning derived from the DCT. This is a generally accepted model of  
57  
58  
59  
60



1  
2  
3 human cognition that encompasses an initial fast response to a problem (System  
4 1) that occurs at a subconscious level and is associated with or followed by a  
5 slow analytic, reflective response (System 2). [15] The initial response is based  
6 on [16] a mental construct made up of the individual's interpretation of past  
7 experience, understanding of theories of professional knowledge, value  
8 judgments and the social context. Initial judgments based on these pre-existing  
9 constructs in relation to the context of the new case, lead to the construction of a  
10 frame [17] that limits and gives direction to the rest of the cognitive process. [18]

11  
12  
13  
14  
15  
16  
17  
18 Closure of the process may occur with minimal or no exposure to the analytic  
19 System 2. Just how much analysis occurs depends on the relative dominance of  
20 System 1. The use of closure rules, [19] is consistent with System 2. Diagnostic  
21 error frequently occurs at initiation, but most often at closure and both Systems 1  
22 and 2 may be involved. [4] It is the congruence of the DTC with what we know  
23 about clinical reasoning that leads us to use it as the model for this study.  
24  
25  
26  
27  
28  
29  
30  
31

## 32 **Participants**

33  
34 Primary care clinicians (known as General Practitioners or GPs in the UK) were  
35 asked to first define diagnostic error and then discuss such cases from their  
36 practice. 15 GPs (>5 year in practice) working in primary care in Oxfordshire,  
37 provided 45 cases. The model highlights key areas of knowledge and critical  
38 value judgments that are used in the clinical encounter that provide the questions  
39 for our interviews. These are described in Appendix 1. We agreed that data  
40 saturation had been reached about two thirds of the way and did not recruit more  
41 participants.  
42  
43  
44  
45  
46  
47  
48  
49

## 50 **Analysis**

51  
52 Three researchers searched the text independently for underlying themes in  
53 relation to our conceptual framework. The steps in the dual theory provided the  
54 structure for this, so that it commenced with themes for the initial salient features  
55 of the case and ended with closure. Categories were coded according to  
56  
57  
58  
59  
60

1  
2  
3 emerging themes and added to or changed as new concepts emerged. [20] The  
4 researchers compared their findings in person, on Skype and through emails.  
5 This occurred up to once or twice a week over a 2-3 month period. Differences  
6 in interpretation were few and were discussed. There were no major differences  
7 and consensus was reached on clustering to common themes. Direct quotes  
8 from the interviews appear in italics, numerics preceded by G are interview  
9 identifiers.

## 18 Results

20 Participants indicated that our questions were easy to follow and most  
21 commented that they enjoyed the interview as a good way to reflect on practice.

### 25 Definitions of diagnostic error

26 The definitions of diagnostic error provided by respondents were consistent with  
27 previous definitions. Over half of the 45 cases analysed were associated with the  
28 clinician focusing on a single diagnosis from presentation to closure of the  
29 cognitive process. Respondents divided errors into *two different categories*  
30 (*G12*): Firstly the wrong diagnostic label consisting of a *diagnosis that's wrong or*  
31 *proven to be wrong by yourself or someone else at a later date (G3)*, and  
32 secondly delayed diagnosis described as *missed the boat you should have done*  
33 *something but you didn't (G2)*.

34 GPs raised two issues that caused difficulties in defining an error, namely  
35 variation in how to deal with the severity of the impact of the error: *I rarely give*  
36 *someone a firm diagnosis... it would be an error if there was something serious*  
37 *and I had told someone [ it ] wasn't (G8)*, and also what constitutes unacceptable  
38 delay given that *lots of what we see is at low prevalence and evolving, so at the*  
39 *very front end it's very vague so actually most of that by definition should be*  
40 *delayed (G1)*.

### 56 The process of clinical reasoning in relation to diagnostic error

1  
2  
3 Results are reported with reference to the 45 cases and not individual GPs. The  
4 cohort provided sufficient data for a case by case analysis of errors, but not for  
5 comparing across the 15 GPs, though there were no indications of differing  
6 themes between individuals. The themes identified divided into two main groups:  
7 initiation and setting the initial diagnostic frame, followed by stopping the search  
8 for further clinical information and achieving diagnostic closure. Additional  
9 themes which emerged are also discussed.  
10  
11  
12  
13  
14  
15  
16  
17  
18

### 19 **Initiation and setting the initial diagnostic frame**

20 Salient features link the individual clinician's personal knowledge of similar cases  
21 to the new presentation. A number of themes emerged from our analysis to  
22 shape the frame for the new case in its specific context. In most cases GPs  
23 formed instantaneous diagnoses. For example, the patient's appearance, -  
24 *thought actually looked OK for a first child (G19)*, or, *she didn't sound too unwell*  
25 *over the phone (G9)* - before other information was available, provided a  
26 powerful bias for framing the case. In over 2/3 (31/45) of cases the focus was on  
27 a single diagnosis, in about half of these based on presentation with a pre-  
28 existing diagnostic label (16/31). Box 1 reconstructs such a case.  
29  
30  
31  
32  
33  
34  
35  
36

### 37 **Box 1 here**

38  
39  
40 The patient's history of previous psychosocial problems or abnormal behaviour,  
41 were predominant at this stage of the presentation: *previous consultation which*  
42 *had set her up as a particular kind of person (4)*. Other salient features led GPs  
43 to instant recognition of a diagnosis or a limited number of differentials. For  
44 instance, *just focusing on the vomiting (39)*, made the GP think of a gastric  
45 problem and delayed the diagnosis of an obstructed hernia. Wrong localisation  
46 framed the cognitive process and biased further information gathering, directly  
47 impacting on diagnostic closure thresholds.  
48  
49  
50  
51  
52  
53  
54

55 Participants made repeated references to needing to focus on the natural history  
56 of disease and expected response to treatment. For instance in referring to a  
57  
58  
59  
60

1  
2  
3 case of missed cancer: *people that have haemorrhoids that respond beautifully*  
4 *to treatment and have no other symptoms we don't tend to think, oh have they*  
5 *got a colonic cancer (14). Or, the need for experience: *lacked experience at that**  
6 *time [to] potential of this case....and work on the possible diagnosis (9).* Most of  
7 these references to experience were suggestive of knowledge gaps rather than  
8 cognitive error only. Further examples of biases arising from the initial framing  
9 appear in Table 1.  
10  
11  
12  
13  
14  
15

### 16 **Table 1 here**

### 17 **Conditions and thresholds for diagnostic closure**

18  
19  
20  
21  
22 Participants did not use numerical criteria to describe the thresholds they used to  
23 decide when to stop searching for more clinical information. Nor did they express  
24 confidence in their decisions this way. When pressed, some responded in terms  
25 such as: *the test would exclude X in 70% of cases, or I was more than 80%*  
26 *certain that I excluded Y*, but the basis for these numerical values was very  
27 unclear. Since we felt that a number of participants found these questions  
28 judgmental, we therefore dropped them as the interview schedule progressed.  
29  
30  
31  
32  
33  
34

35 A number of GPs raised safety netting spontaneously, or in response to our  
36 questions, related to diagnostic closure. It soon became apparent that  
37 recollections were hazy and they were unsure whether they actually used safety  
38 netting, or just thought that they should have. Therefore we do not include safety  
39 netting, or just thought that they should have. Therefore we do not include safety  
40 netting in our analysis, recognising its importance as a potential cause of error.  
41  
42  
43  
44

45 The decisions made at closure were affected by biases from the setting of the  
46 initial frame, effectively impeding the reflective System 2 review expected at this  
47 stage. Box 2 is a reconstruction of such a case to provide insights into how the  
48 relationship between biases formed at initiation may affect decisions at closure.  
49  
50  
51  
52

### 53 **Box 2 here**

54  
55 Other themes related to diagnostic errors after ignoring or misinterpreting the  
56 predictive value of critical information coming from the patient, as did ignoring  
57  
58  
59  
60

1  
2  
3  
4  
5  
6  
7  
8  
9  
10  
11  
12  
13  
14  
15  
16  
17  
18  
19  
20  
21  
22  
23  
24  
25  
26  
27  
28  
29  
30  
31  
32  
33  
34  
35  
36  
37  
38  
39  
40  
41  
42  
43  
44  
45  
46  
47  
48  
49  
50  
51  
52  
53  
54  
55  
56  
57  
58  
59  
60

'gut feelings'. [21] Other respondents noted the need to be circumspect when responding to patient needs, including poor outcome with a patient who did not wish to follow advice: *had a cruise booked and he chose to cancel the appointment and go on the cruise (15)*. Some GPs raised issues about their own behaviours: *one's own state of confidence or call it what you want competence confidence arrogance or risk taking or not risk caution all play in the actual what you decide to do (12)*; *I'm right at one end of low referrers (43)*. Contextual factors were often raised as contributing to faulty decisions: *[knowing how busy it is before a week end] do I want to send a frail, elderly lady up to the hospital on a Friday afternoon when it would be mayhem [there] (34)*; explaining a missed diagnosis: *we were really busy and I think they came in as an emergency (39)*. Table 2 provides examples of biases affecting thresholds for ruling disease in or out.

## Discussion

### Main findings

The findings of this study identify the initiation and closure of the cognitive process in the clinical consultation as those most exposed to risk of diagnostic error. Initiation is a critical step as it sets the frame for subsequent information search, whereas closure occurs when thresholds for stopping the search have been met. We show that cognitive biases developed at framing appear to relate directly to errors at the end of the process. We refer to these as warning signs (Table 2), as we believe they can be used to alert the clinician to the increased risk of diagnostic error. Previous studies [4] have also highlighted these two steps as the points where most cognitive errors occur. However, our findings build on these, providing insights into the underlying sources of the biases that made the process go wrong. This is consistent with Weath and Nemeth's [17] observation that '[we] do not learn much by asking why the way a practitioner

1  
2  
3 framed the problem turned out to be wrong. We do learn when we discover why  
4 that framing seemed so reasonable at the time'.  
5  
6

7  
8 The initial process of framing a new case is mostly subconscious, and occurs  
9 within the domain of System 1 of the dual theory of cognition (instant, fast  
10 response). The salient feature of the case leads to recognition of similar cases,  
11 and framing is modulated by constructs from experience, knowledge, values and  
12 social context. [22] If there is no instant recognition, System 2 (slow, analytic  
13 thinking) may be engaged, but this may consist of no more than gut feelings. [21]  
14 In the cases analysed here, there was a dominant focus on a single diagnosis. It  
15 is likely that other options were also entertained but forgotten by interviewees.  
16 The most significant biases occurring at this stage related to patients with pre-  
17 existing diagnostic labels and those with underlying psychosocial problems  
18 (Table 1). Ignoring red flags or critical cues may have been related to processes  
19 being biased through the frame, but equally well, they could be explained by lack  
20 of knowledge of the significance of these clinical features.  
21  
22

23  
24 We have previously suggested [23] that the informal 'rules' that clinicians use to  
25 cease their search for further clinical features during a consultation (i.e. stopping  
26 rules for diagnostic closure) involved three criteria: (i) high risk conditions have  
27 been excluded and other options appropriately ruled in; (ii) there was a direct  
28 response to the patient's needs; (iii) there was a reliable safety net in place. As a  
29 result of the biases we describe based on our current findings, it appears that in  
30 some cases red flags and critical cues suggesting alternative diagnoses were  
31 ignored or misinterpreted. The focus was on ruling in early diagnoses, rather than  
32 the usually preferred option of ruling hazardous conditions out first. This is  
33 consistent with System 1 being dominant, ignoring the reflective System 2. We  
34 found that ignoring or failing to search for important cues may be due to  
35 knowledge gaps or biased reasoning processes. Participants' frequent reference  
36 to '*not being experienced*' suggests knowledge gaps contributing to a number of  
37 errors. For these reasons, and contrary to much of the literature (with the  
38  
39  
40  
41  
42  
43  
44  
45  
46  
47  
48  
49  
50  
51  
52  
53  
54  
55  
56  
57  
58  
59  
60

1  
2  
3 exception of Norman and Eva [10] ), we therefore conclude that lack of  
4 knowledge is indeed likely to be an important factor in diagnostic error.  
5  
6

7  
8 Finally, we found that participants did not use numerical values as thresholds for  
9 stopping the collection of more clinical data. We hypothesize that this relates to  
10 the complexity of these judgments: needing to satisfy decision rules based  
11 largely on subjective inputs. Firstly, the clinician needs to take into account the  
12 basis of ruling disease in or out. Most early formulations are at least partly based  
13 on System 1 knowledge and have a tendency to bias unless one takes time for  
14 reflection through the influence of System 2. Robust data for predictive values  
15 may not exist or not be powerful enough to lead to safe closure. Secondly,  
16 assessing the values and individual needs of patients in the context of an illness  
17 are subjective. Thirdly, confidence levels in a safety net may not be reliable, yet  
18 confidence in safe closure must be closely dependent on confidence in the  
19 quality of the net. [23]  
20  
21  
22  
23  
24  
25  
26  
27  
28

29  
30 If we add to these issues the impact of the context or environment on the  
31 clinician's decision making [24] and willingness or ability to involve System 2, it  
32 becomes apparent why Bayesian and similar 'rational' approaches are not the  
33 norm. It comes as no surprise when one of our GPs refers to closure as it *feels*  
34 *like a nebulous thing*. [23] We believe that clinicians use individualised and often  
35 tacit guides for how to deal with the problem and other '*multifarious factors that*  
36 *come into reckoning when making decisions*.' [22] With this package they then  
37 make judgments, described by Polanyi [16] writing about personal knowledge: '*in*  
38 *respect of choices made in the exercise of personal judgment ....there is always*  
39 *a range of discretion open in a choice.... In view of the unspecifiability of the*  
40 *particulars on which such a decision will be based, it is heavily affected by the*  
41 *participation of the person pouring himself into these particulars and may in fact*  
42 *represent a major feat of his originality,*' and concludes that '*valid choices can be*  
43 *made by submitting to one's own sense of responsibility*'. This last statement  
44 sums up the core of professionalism, where we expect a deep sense of  
45 responsibility from the decision maker.  
46  
47  
48  
49  
50  
51  
52  
53  
54  
55  
56  
57  
58  
59  
60

1  
2  
3 So, what can we offer to reduce error? In an ideal world clinicians would have  
4 robust clinical data with high true positive and negative characteristics. This could  
5 then be used to develop decision aids, as suggested by Buntinx et al. [25]  
6  
7 However, such information is scarce and there would still be a great deal of  
8 subjective judgment to be made. Providing indicators of early warning signs  
9 where errors may occur in the diagnostic process may help to prompt a reflective  
10 review of the cognitive process. We need to look at ways of presenting this as an  
11 integral part of the clinical process. This approach may then become part of the  
12 ongoing continual professional development for clinicians. Figure 1, based on our  
13 results is a summary of how warning signs may be incorporated in a practice  
14 environment to constructively promote reflection in practice.  
15  
16  
17  
18  
19  
20  
21  
22

23  
24 **Figure 1 here**

### 25 26 **Strengths and limitations of the study**

27  
28 We designed the study to be consistent with desired future directions as outlined  
29 in the introduction. It is based on a strong theoretical framework provided by the  
30 DTC. The strength of this model is not only that it 'intuitively supports how our  
31 brains work', [12] but particularly that the initiation of the process is consistent  
32 with System 1 working at a subconscious level. Our interviews explore what is  
33 salient in a presentation [26] and show how initial biases influence the diagnostic  
34 process. We identify warning signs on the way, alerting clinicians to risk of error.  
35 [4] These may have the potential to reduce diagnostic error. [11]  
36  
37  
38  
39  
40  
41  
42  
43

44  
45 Limitations relate to three main issues. First, sampling: participants were not  
46 chosen at random but consisted of self-selected individuals made up of more  
47 than half of the cohort we approached. This is an almost universal problem with  
48 studies that involve busy and senior clinicians. Our research needs to be  
49 replicated in other settings in the UK or in countries with different health systems,  
50 or with other specialties. However, given that our findings are consistent with  
51 other studies with different methodologies and use a strong theoretical base the  
52 results are likely to have a degree of generalisability. Second, hindsight bias:  
53  
54  
55  
56  
57  
58  
59  
60



1  
2  
3 clinicians generally become aware of errors after an event and the information  
4 may be fragmentary. They construct a narrative based on hindsight, ending up  
5 with 'illusions that one has understood the past'. [15] In the construction of the  
6 narrative, hindsight bias converts events 'into a coherent causal framework'. [17]  
7 Occurring at a subconscious level, the bias is inevitable and all previous studies  
8 of error were tainted by it. We therefore attempted to minimise these limitations  
9 by examining the clinicians in real life situations rather than a laboratory, and  
10 avoiding data that was collected for other reasons (e.g. litigation), [17] interviews  
11 tried to reconstruct the context in which error took place. Third, we do not have  
12 evidence that alerts such as the warning signs we propose will reduce diagnostic  
13 errors in clinical practice. Similarly, deliberate practice [27] has not been shown  
14 to be successful in non-procedural specialities but in view of its success in  
15 procedural clinical settings, would be a strong contender to be explored [4]  
16  
17  
18  
19  
20  
21  
22  
23  
24  
25  
26  
27

### 28 **Implications for practice**

29  
30 There are two prerequisites for change. 1) Early and systematic recognition of  
31 errors including near misses: this could be achieved through regular, non-  
32 threatening, in-practice audits or significant event analyses. Without this it will not  
33 be possible to reduce hindsight bias. 2) Provision of a clinical environment that  
34 promotes reflection in action to detect the causes of process bias and knowledge  
35 gaps. This may be more feasible when working in a group of trusted peers and  
36 using methods such as incident reviews and journal meetings focused on recent  
37 errors as a way of reviewing the diagnostic reasoning processes as well as  
38 knowledge gaps. Since reflection will need to focus both on the cognitive process  
39 and evidence based diagnosis resources, it would be important to have meetings  
40 facilitated by a trained, preferably internal GP.  
41  
42  
43  
44  
45  
46  
47  
48  
49  
50

### 51 **Implications for future research**

52  
53 We do not know if the practice changes that we propose will lead to better clinical  
54 care and this needs separate evaluation. To explore the generalisability of our  
55 findings we need to replicate this study in groups of clinicians in other specialties  
56  
57  
58  
59  
60

1  
2  
3 and settings. Future studies will need to deal with cases closer to the event and  
4 place even more emphasis on context. The model of deliberate practice [27] is  
5 likely to be suitable for ongoing professional development and training to reduce  
6 error. Some of these have led to improved clinical care, albeit in interventional  
7 specialties, which suggests that similar improvements might be feasible in  
8 primary care, but this needs evaluation.  
9

## 14 **Conclusions**

15  
16  
17 Initiation and closure of the cognitive process are most exposed to the risk of  
18 diagnostic error in primary care. Cognitive biases developed at framing directly  
19 influence errors at the end of the process. We refer to these as warning signs  
20 that can alert clinicians to the increased risk of diagnostic error. The most  
21 significant reasoning biases we observed related to patients presenting with pre-  
22 existing diagnostic labels and psychosocial problems. Others included the use of  
23 heuristics, patient's appearance, wrong initial localisation of the problem and  
24 probabilistic bias. Subsequently ignored red flags or critical cues may have been  
25 related to biased process through the frame, but could also be explained by  
26 knowledge gaps.  
27  
28  
29  
30  
31  
32  
33  
34

35 We conclude that lack of knowledge is likely to be an important factor in  
36 diagnostic error. Reducing diagnostic errors in primary care should focus on early  
37 and systematic recognition of errors including near misses, and a continuing  
38 professional development environment that promotes reflection in action to  
39 highlight possible causes of process bias and of knowledge gaps. Alerting  
40 clinicians to warning signs of where there is an increased risk of error may be one  
41 way to prompt a reflective review of the cognitive process. For this to become an  
42 integral part of the clinical process, we may need to experiment with deliberate  
43 practice of looking for warning signs as a potential method of professional  
44 development to reduce error.  
45  
46  
47  
48  
49  
50  
51  
52  
53  
54

## 55 **References**

1. Graber ML, Franklin N, Gordon R. Diagnostic error in internal medicine. *Arch Intern Med* 2005; 165: 1493-1499.
2. Schiff GD, Hasan O, Kim S et al., Diagnostic error in medicine: analysis of 583 physician-reported errors. *Arch Intern Med* 2009; 169: 1881-1887.
3. Singh H, Thomas EJ, Khan MM et al. Identifying diagnostic errors in primary care using an electronic screening algorithm. *Arch Intern Med* 2007; 167: 302-308.
4. Ely JW, Graber ML, Croskerry P. Checklists to reduce diagnostic errors. *Acad Med* 2011; 86:307-313.
5. Jena AB, Seabury S, Lakdawalla D et al. Malpractice risk according to physician specialty. *N Engl J Med* 2011; 365: 629-636.
6. Kostopoulou O, Delaney BC, Munro CW. Diagnostic difficulty and error in primary care-- a systematic review. *Fam Pract* 2008; 25: 400-13.
7. Silk, N., An Analysis of 1000 Consecutive General Practice Negligence Claims. *Medical Protection Society* 2000; 1-18.
8. Wallis K, Dovey S. No-fault compensation for treatment injury in New Zealand: identifying threats to patient safety in primary care. *BMJ Qual Saf* 2011; 20: 87-91.
9. Schiff GD, Kim S, Abrams R et al. Diagnosing Diagnosis Errors: Lessons from a Multi-institutional Collaborative Project and Methodology 2005; [www.ahrq.gov/downloads/pub/advances/vol2/schiff.pdf](http://www.ahrq.gov/downloads/pub/advances/vol2/schiff.pdf) (sighted 20/08/2011)
10. Norman GR, Eva KW. Diagnostic error and clinical reasoning. *Med Educ* 2010; 44: 94-100.
11. Elstein AS. Thinking about diagnostic thinking: a 30-year perspective. *Adv Health Sci Educ Theory Pract* 2009; 14 S 1: 7-18.
12. Winters BD, Aswani MS, Pronovost PJ. Commentary: Reducing diagnostic errors: another role for checklists? *Acad Med* 2011; 86: 279-281.
13. Norman G. Dual processing and diagnostic errors. *Adv Health Sci Educ Theory Pract*, 2009; 14 S 1: 37-49.
14. Balla JI, Heneghan C, Glasziou P et al. A model for reflection for good clinical practice. *J Eval Clin Pract*, 2009; 15: 964-969.
15. Kahneman D. *Thinking fast and slow*. p21-2. Allen Lane: London, 2011.
16. Polanyi M. *The study of man*. The University of Chicago Press: London, 1959.
17. Wears RL, Nemeth CP. Replacing hindsight with insight: toward better understanding of diagnostic failures. *Ann Emerg Med* 2007; 49: 206-209.
18. Lucchiari C, Pravettoni G. Cognitive balanced model: a conceptual scheme of diagnostic decision making. *J Eval Clin Pract* 2012; 18: 82-88.
19. Gigerenzer G, Goldstein DG. Betting on one good reason: take the best heuristic. , in *Simple Heuristics that Make Us Smart*. , Gigerenzer G, Todd PM, eds: **ABC Research Group. Simple Heuristics that Make Us Smart**.Oxford University Press: New York 1999.
20. Ritchie J, Spencer L. Qualitative data analysis for applied policy research, in *Analysing Qualitative Data*, Bryman A, Burgess RG eds. Routledge: London, 2011.
21. Stolper E, van de Wiell M, van Royen P et al. Gut feelings as a third track in general practitioners' diagnostic reasoning. *J Gen Intern Med*, 2011; 26: 197-203.
22. Gabbay J, LeMay A. *Practice-Based Evidence for Healthcare* Routledge:Abingdon, 2011.
23. Balla J, Heneghan C, Thompson M et al. Clinical decision making in a high-risk primary care environment: a qualitative study in the UK. *BMJ Open*, 2012. 2: p. e000414.
24. Berner ES. Mind wandering and medical errors. *Med Educ* 2011; 45: 1068-1069.

- 1  
2  
3  
4  
5  
6  
7  
8  
9  
10  
11  
12  
13  
14  
15  
16  
17  
18  
19  
20  
21  
22
25. Buntinx F, Mant D, van den Bruel A et al., Dealing with low-incidence serious diseases in general practice. *Br J Gen Pract* 2011. 61: 43-6.
26. Kahneman D. Maps of bounded rationality: a perspective on intuitive judgment and choice 2002. Available from: [http://nobelprize.org/nobel\\_prizes/economics/laureates/2002/kahnemann-lecture.pdf](http://nobelprize.org/nobel_prizes/economics/laureates/2002/kahnemann-lecture.pdf) (sighted 8/May/2012).
27. Ericsson KA. Deliberate practice and the acquisition and maintenance of expert performance in medicine and related domains. *Acad Med*, 2004; 79(Suppl 10): S70-81.

23  
24  
25  
26  
27  
28  
29  
30  
31  
32  
33  
34  
35  
36  
37  
38  
39  
40  
41  
42  
43  
44  
45  
46

**Box 1. Case 27: Illustration of initiation of the process and setting the initial diagnostic frame.**

| Reconstruction                                                                                                                                                                                                                                                                                                                                                                                                                                                                                                                                                                                                                                                                                                                                                                                                                                       | Analysis                                                                                                                                                                                                                                                                                                       |
|------------------------------------------------------------------------------------------------------------------------------------------------------------------------------------------------------------------------------------------------------------------------------------------------------------------------------------------------------------------------------------------------------------------------------------------------------------------------------------------------------------------------------------------------------------------------------------------------------------------------------------------------------------------------------------------------------------------------------------------------------------------------------------------------------------------------------------------------------|----------------------------------------------------------------------------------------------------------------------------------------------------------------------------------------------------------------------------------------------------------------------------------------------------------------|
| <p><b>Presentation</b></p> <p><i>Patient in 70's came with breathlessness .. the first thing was he kept saying to me "this is exactly like it was about 6 months previously".. looked back in his notes and 6 months previously he'd been diagnosed with heart failure and so I thought "well, you know" and he was so insistent that it was the same thing... he was a bit breathless but there wasn't anything really obvious going on .. so I thought maybe he was anaemic as well and that had got worse. And it was a Saturday morning so I couldn't easily get any tests straight away so I booked for him to come back first thing on Monday morning for blood tests and ECG and I sent him up to the hospital for a chest x-ray. He was so insistent that it was the same thing and in retrospect that was really misleading for me</i></p> | <p>Salient feature was patient's insistence that the diagnosis was the same as previously, seemingly confirmed by looking at case notes of his previous presentation.</p> <p>System 2 in action as tests ordered, largely to rule in cardiac failure and rule out possible complicating factor of anaemia.</p> |
| <p><b>Context issues</b></p> <p><i>It was a Saturday morning so I couldn't easily get any tests straight away.</i></p>                                                                                                                                                                                                                                                                                                                                                                                                                                                                                                                                                                                                                                                                                                                               | <p>Management affected by practice environment - routine blood tests not immediately available</p>                                                                                                                                                                                                             |

|                                                                                                                                                                                                                                            |                                                                                                                                                                       |
|--------------------------------------------------------------------------------------------------------------------------------------------------------------------------------------------------------------------------------------------|-----------------------------------------------------------------------------------------------------------------------------------------------------------------------|
| <b>Outcome</b><br><i>Next day contacted by one of his friends .. to say "actually, he's had a pulmonary embolism .. he'd got quite a lot worse that afternoon and been admitted to hospital and ..CT showed multiple pulmonary emboli.</i> | Delay in diagnosis likely to System 1 overpowering System 2, raising closure threshold enough to be affected by context issues (no blood tests available at weekend). |
| <b>Summary</b><br>System 1 single diagnosis based on existing label, immediately jumps to the diagnosis. Weak System 2 affected by context issues, delaying diagnosis.                                                                     |                                                                                                                                                                       |

For peer review only

**Table 1. Biases arising from salient features of presentation which initiate the diagnostic process and frame the direction of subsequent information gathering.**

|                                                                                                      |                                                                                                                                                                                                                                                                         |
|------------------------------------------------------------------------------------------------------|-------------------------------------------------------------------------------------------------------------------------------------------------------------------------------------------------------------------------------------------------------------------------|
| <p><b>Previous diagnosis label</b></p>                                                               | <p><i>Because somebody had wrote down that he had bell's palsy and he'd been seen in hospital .. I immediately thought that's what he had (1);</i></p> <p><i>Story of the insect bite and that was what we were sort of using as our diagnostic tool really (6)</i></p> |
| <p><b>Pre existing psychosocial problems</b></p>                                                     | <p><i>all thought some of the bleeding might be from sexual abuse (31);</i></p> <p><i>sick notes, and prescriptions and whatever and I thought that that was probably the main reason behind the um sort of um consultations (37)</i></p>                               |
| <p><b>Reassurance from initial appearance</b></p>                                                    | <p><i>when I called the patient back I got hold of the granny who said oh yes mum's in the shower that as a clue to me meant that maybe the child wasn't that ill (11);</i></p> <p><i>She wasn't terribly unwell (33)</i></p>                                           |
| <p><b>Similarity to a recent case or similarity to representative case built from experience</b></p> | <p><i>My diagnosis was fed by a patient the previous week who'd presented with an ischemic foot (40);</i></p> <p><i>And I thought he had cancer because of the mass and the weight loss and the paleness (44).</i></p>                                                  |
| <p><b>Incorrect localisation of salient features</b></p>                                             | <p><i>vomiting and sweating and diarrhoea .. epigastric pain (10);</i></p> <p><i>epigastric discomfort . . . must be indigestion (20).</i></p>                                                                                                                          |
| <p><b>Common things occurring commonly (Probabilistic reasoning)</b></p>                             | <p><i>viral infections are common (16);</i></p> <p><i>my preconception at the time was that a young &lt;30 year old is very, very unlikely to have bowel cancer (32)</i></p>                                                                                            |
| <p><b>Ignoring as well as over or under estimating red flags or critical cues</b></p>                | <p><i>he came in hopping, which is quite unusual. Not weight bearing at all is quite unusual (30);</i></p> <p><i>normal chest on examination (24)</i></p>                                                                                                               |

|                                                                  |                                                                                                                                         |
|------------------------------------------------------------------|-----------------------------------------------------------------------------------------------------------------------------------------|
| <b>Vague presenting symptoms, no salient features recognised</b> | <i>fatigue from whatever cause (3); it was all very vague (28);<br/><br/>atypical leg pain couldn't work out what was going on (21)</i> |
|------------------------------------------------------------------|-----------------------------------------------------------------------------------------------------------------------------------------|

**Box 2. Case 14: Illustration of dominant System 1 impeding System 2 review at closure, leading to error.**

| Reconstruction                                                                                                                                                                                                                                                                                                                                                                                                                                                                                                                                                                                                                          | Analysis                                                                                                                                                                                                                                                  |
|-----------------------------------------------------------------------------------------------------------------------------------------------------------------------------------------------------------------------------------------------------------------------------------------------------------------------------------------------------------------------------------------------------------------------------------------------------------------------------------------------------------------------------------------------------------------------------------------------------------------------------------------|-----------------------------------------------------------------------------------------------------------------------------------------------------------------------------------------------------------------------------------------------------------|
| <p><b>Presentation</b></p> <p><i>Elderly patient seen 6 years ago for what appeared to be resolving haemorrhoidal bleed .. 6 months prior [to the most recent visit] described narrow stools like a snake ..[At the present visit] bowel frequency and some bleeding with examination of clear external piles no rectal masses on <b>rectal examination</b>. [Also] did some bloods but wasn't anaemic.</i></p> <p><i>[I ignored] the older the patient the lower the threshold for colorectal cancer that we would have for referring .. red flag that's there for a reason therefore it would be foolish to sort of dismiss..</i></p> | <p>System 1 dominance may explain the high threshold for vigilance in this age group.</p> <p>No significant attempt to rule out and normal Hb wrongly used for rule <b>out</b>. Another example of the power of a perceived label in biasing process.</p> |
| <p><b>Salience</b></p> <p><i>External piles with a normal PR .. [6 years ago] with haemorrhoides seen by a colleague.</i></p>                                                                                                                                                                                                                                                                                                                                                                                                                                                                                                           | <p>Salient feature was a normal examination 6 years earlier.</p>                                                                                                                                                                                          |
| <p><b>Outcome</b></p> <p><i>2 months after last visit ..change in bowel habit with rectal bleeding and as part of investigation had a sigmoidoscopy and biopsy which found a malignant colonic tumour</i></p>                                                                                                                                                                                                                                                                                                                                                                                                                           | <p>Delay in diagnosis likely to System1 overpowering System 2, raising closure threshold.</p>                                                                                                                                                             |
| <p><b>Summary</b></p> <p>System 1 single diagnosis based on label immediately jumps to the diagnosis. Ignored expected natural history, and the presence of a red flag. Diagnosis was delayed until new critical cue emerged.</p>                                                                                                                                                                                                                                                                                                                                                                                                       |                                                                                                                                                                                                                                                           |

**Table 2. Effect of framing biases on closure thresholds for ruling disease in or out.**

|                                                                           |                                                                                                                                                                                                                                                                                                                                                                                                                                                                                                                                                             |
|---------------------------------------------------------------------------|-------------------------------------------------------------------------------------------------------------------------------------------------------------------------------------------------------------------------------------------------------------------------------------------------------------------------------------------------------------------------------------------------------------------------------------------------------------------------------------------------------------------------------------------------------------|
| <p><b>Presents with diagnosis label</b></p>                               | <p><i>I'd keyed in too quickly and then just ignored any of the sort of differential information (1);</i></p> <p><i>When your brain immediately jumps to the obvious diagnosis its worth just having in the back of your mind what else it could be (6)</i></p>                                                                                                                                                                                                                                                                                             |
| <p><b>Psychosocial label/behavioural</b></p>                              | <p><i>I closed it before she came in .. I think hadn't really thought out the differential diagnosis (4);</i></p> <p><i>Not appreciating the seriousness of the, of the problem, coupled with not really wanting to think about it because the patient was so difficult. (31)</i></p>                                                                                                                                                                                                                                                                       |
| <p><b>Ignores red flag</b></p>                                            | <p><i>[did not] take a step back and consider what we call the sort of red flagged ones, are there any flags in front of you that are presenting information of other serious diseases that might kill or harm? (2);</i></p> <p><i>Think I ought to have thought this severe pain which isn't improving I ought to go back to cancer but so I was put off by the negative investigations and that kind of prior assessment and err .. level of pain which was not otherwise explained (15)</i></p>                                                          |
| <p><b>Ignores possibility of serious disease with low probability</b></p> | <p><i>[ignored] older the patient the lower the threshold for particularly for colorectal cancer that we would have for referring .. red flag that's there for a reason therefore it would be foolish to sort of dismiss (14);</i></p> <p><i>My preconception at the time was that a young 28 year old is very, very unlikely to have bowel cancer .... slightly raised C-reactive protein...it wasn't dramatically raised ... I certainly didn't act on it because I think I was confused by the fact he'd got better the second consultation (32)</i></p> |



|                                                             |                                                                                                                                                                                                                                                                                                        |
|-------------------------------------------------------------|--------------------------------------------------------------------------------------------------------------------------------------------------------------------------------------------------------------------------------------------------------------------------------------------------------|
| <b>Used wrong clinical features to rule-out a condition</b> | <i>[ignored] new onset quite severe headache in a (40) something year old is a red flag in itself (22);</i><br><br><i>We think of ectopic pregnancy as being bleeding and pain and this was painless bleeding (17)</i>                                                                                 |
| <b>Ignored gut feelings</b>                                 | <i>it's a sixth sense .. that I think as you gain more experience you really hone and fine tune .. it's invaluable particularly with children 19; was not terribly unwell ... obviously needed more investigations.. wasn't happy with my decision even though it wasn't a conscious process. (33)</i> |

For peer review only

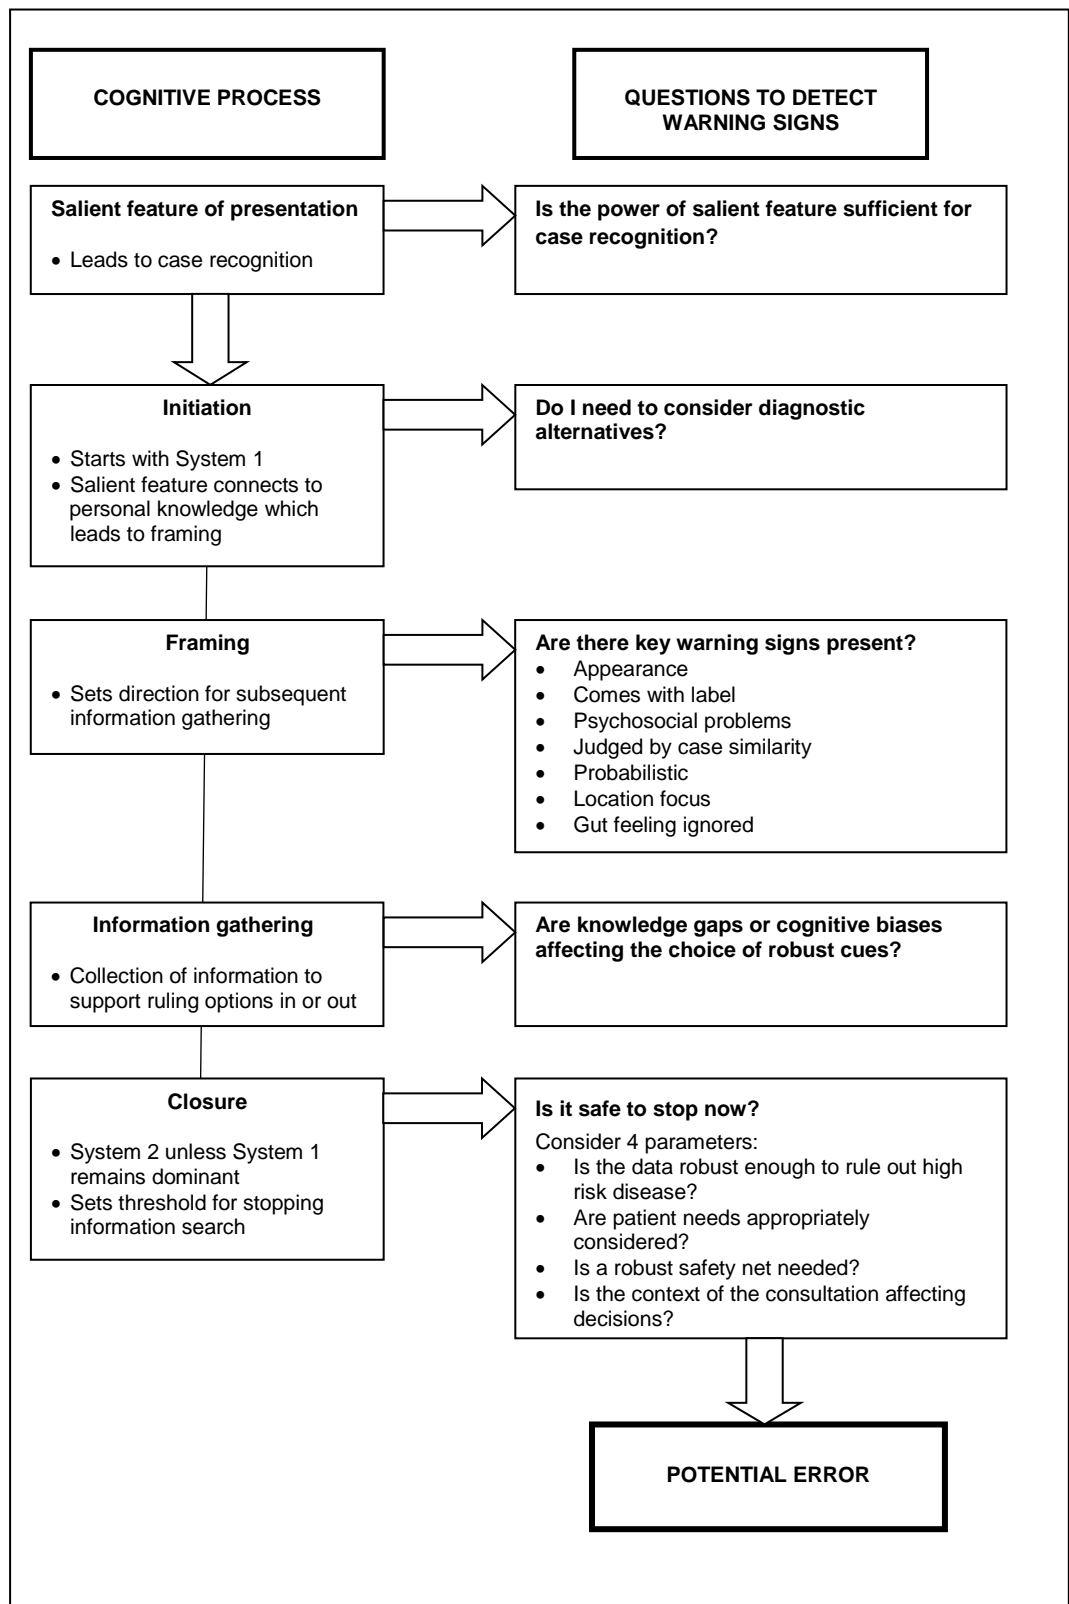

Figure 1. Questions to relate potential sources of error to cognitive process: Anatomy of diagnostic error

## COREQ guidelines table

| Domain 1:<br>Research team<br>and reflexivity |                                          |                                                                                                                                                  | Comment                                               |
|-----------------------------------------------|------------------------------------------|--------------------------------------------------------------------------------------------------------------------------------------------------|-------------------------------------------------------|
| Personal<br>Characteristics                   |                                          |                                                                                                                                                  |                                                       |
| 1.                                            | Interviewer/facilitator                  | Which author/s conducted the interview?                                                                                                          | JB                                                    |
| 2.                                            | Credentials                              | What were the researcher's credentials? <i>E.g. PhD, MD</i>                                                                                      | JB:FRCPE, FRACP, MA; CG:BM,BS; MB*: MEduc             |
| 3.                                            | Occupation                               | What was their occupation at the time of the study?                                                                                              | Research Fellows                                      |
| 4.                                            | Gender                                   | Was the researcher male or female?                                                                                                               | 1 male/2 female for analysis                          |
| 5.                                            | Experience and training                  | What experience or training did the researcher have?                                                                                             | >30 years qualitative research JB and MB*, trainee CG |
| Relationship with participants                |                                          |                                                                                                                                                  | Nil                                                   |
| 6.                                            | Relationship established                 | Was a relationship established prior to study commencement?                                                                                      | With some of them                                     |
| 7.                                            | Participant knowledge of the interviewer | What did the participants know about the researcher? <i>e.g. personal goals, reasons for doing the research</i>                                  | Broad outlines given .                                |
| 8.                                            | Interviewer characteristics              | What characteristics were reported about the interviewer/facilitator? <i>e.g. Bias, assumptions, reasons and interests in the research topic</i> | Reasons for research and interest in training         |
| <b>Domain 2: study design</b>                 |                                          |                                                                                                                                                  |                                                       |
| Theoretical framework                         |                                          |                                                                                                                                                  | Dual theory of cognition                              |

## COREQ guidelines table

|                       |                                       |                                                                                                                                                                    |                                                                      |
|-----------------------|---------------------------------------|--------------------------------------------------------------------------------------------------------------------------------------------------------------------|----------------------------------------------------------------------|
| 9.                    | Methodological orientation and Theory | What methodological orientation was stated to underpin the study?<br><i>e.g. grounded theory, discourse analysis, ethnography, phenomenology, content analysis</i> | Content analysis                                                     |
| Participant selection |                                       |                                                                                                                                                                    |                                                                      |
| 10.                   | Sampling                              | How were participants selected?<br><i>e.g. purposive, convenience, consecutive, snowball</i>                                                                       | Convenience                                                          |
| 11.                   | Method of approach                    | How were participants approached? <i>e.g. face-to-face, telephone, mail, email</i>                                                                                 | Email and face-to-face                                               |
| 12.                   | Sample size                           | How many participants were in the study?                                                                                                                           | 15                                                                   |
| 13.                   | Non-participation                     | How many people refused to participate or dropped out? Reasons?                                                                                                    | 60% of those approached not interviewed for lack of time or interest |
| Setting               |                                       |                                                                                                                                                                    |                                                                      |
| 14.                   | Setting of data collection            | Where was the data collected?<br><i>e.g. home, clinic, workplace</i>                                                                                               | Clinic for most, 32at home                                           |
| 15.                   | Presence of non-participants          | Was anyone else present besides the participants and researchers?                                                                                                  | No                                                                   |
| 16.                   | Description of sample                 | What are the important characteristics of the sample? <i>e.g. demographic data, date</i>                                                                           | All experienced GPs in active clinical practice                      |
| Data collection       |                                       |                                                                                                                                                                    |                                                                      |
| 17.                   | Interview guide                       | Were questions, prompts, guides provided by the authors? Was it pilot tested?                                                                                      | Pilot tested. Semi-structured interview                              |
| 18.                   | Repeat interviews                     | Were repeat interviews carried out? If yes, how many?                                                                                                              | No                                                                   |

## COREQ guidelines table

|                                        |                                |                                                                                                                                          |                                     |
|----------------------------------------|--------------------------------|------------------------------------------------------------------------------------------------------------------------------------------|-------------------------------------|
| 19.                                    | Audio/visual recording         | Did the research use audio or visual recording to collect the data?                                                                      | Audiotaped                          |
| 20.                                    | Field notes                    | Were field notes made during and/or after the interview or focus group?                                                                  | Yes                                 |
| 21.                                    | Duration                       | What was the duration of the interviews or focus group?                                                                                  | 30 minutes                          |
| 22.                                    | Data saturation                | Was data saturation discussed?                                                                                                           | Yes and reached at about 2/3 of way |
| 23.                                    | Transcripts returned           | Were transcripts returned to participants for comment and/or correction?                                                                 | No                                  |
| <b>Domain 3: analysis and findings</b> |                                |                                                                                                                                          |                                     |
| Data analysis                          |                                |                                                                                                                                          |                                     |
| 24.                                    | Number of data coders          | How many data coders coded the data?                                                                                                     | 3: JB, JG, MB                       |
| 25.                                    | Description of the coding tree | Did authors provide a description of the coding tree?                                                                                    | yes                                 |
| 26.                                    | Derivation of themes           | Were themes identified in advance or derived from the data?                                                                              | Both, as we responded to the data   |
| 27.                                    | Software                       | What software, if applicable, was used to manage the data?                                                                               | NVivo                               |
| 28.                                    | Participant checking           | Did participants provide feedback on the findings?                                                                                       | yes                                 |
| Reporting                              |                                |                                                                                                                                          |                                     |
| 29.                                    | Quotations presented           | Were participant quotations presented to illustrate the themes / findings? Was each quotation identified? e.g. <i>participant number</i> | yes                                 |

## COREQ guidelines table

|     |                              |                                                                        |     |
|-----|------------------------------|------------------------------------------------------------------------|-----|
| 30. | Data and findings consistent | Was there consistency between the data presented and the findings?     | yes |
| 31. | Clarity of major themes      | Were major themes clearly presented in the findings?                   | yes |
| 32. | Clarity of minor themes      | Is there a description of diverse cases or discussion of minor themes? | yes |

\* MB refers to Margaret Balla identified in Acknowledgements

## Appendix 1

**Appendix 1: List of interview questions**

Before commencing the interview participants were reassured about confidentiality and advised that tapes would be destroyed so that voices could not be recognised. Further questions about the process were invited. After Question 1 they were again asked if they were comfortable to proceed.

**Q 1: to gain insights into participants' conceptualisations of a diagnostic error.**  
*What do you regard as a diagnostic error?*

**Q 2: to describe themes of errors in relation to the cognitive model we used.**  
*If you are comfortable, can you tell me about some errors that you have made?*

GPs would then describe an error they made or were closely involved with. This spontaneous response generally covered a clear sequence of the salient features of the case, the context in which it occurred, their analysis of why and where they went wrong and the outcome. They often added remarks about what they learned from it and how they thought they changed their practice as a consequence, with more experience or working in a different environment.

**Q 3: Clarifying questions**

These were used only if more details were needed and were open-ended. Occasional questions used to clarify terminology.

**Q 3.1. : Examples of clarifying questions about framing**

*How do you deal with this sort of undifferentiated, I know there's something but I don't know what it is?*

*So what did you sort of think was the problem? Why do you think it happened?*

**Q 3.2. : Examples of clarifying questions about effect of biases**

*People often talk about getting stuck on the first thing which is what you just said, can you tell me how you manage that because it must be a common issue?*

*So why do you think that happened?*

*You often use the term 'red flag' which you just used, what do you mean by that?*

**Q 3.3. : Examples of clarifying questions about closure thresholds**

*So this issue of confidence, how do you deal with that .. so how do you have a threshold of confidence that you say "stop now",*

*But what makes you feel, do you think, that "I'm not worried you"? What is it?*

*Can I just ask you a question about finishing the consultation? What do you hope to achieve before you're willing to do it.*

Appendix 1

1  
2  
3  
4  
5  
6  
7  
8  
9  
10  
11  
12  
13  
14  
15  
16  
17  
18  
19  
20  
21  
22  
23  
24  
25  
26  
27  
28  
29  
30  
31  
32  
33  
34  
35  
36  
37  
38  
39  
40  
41  
42  
43  
44  
45  
46  
47  
48  
49  
50  
51  
52  
53  
54  
55  
56  
57  
58  
59  
60

*Could you sort of speculate on the idea of a level of confidence that you have in your diagnoses?*

*One of the problems people describe is when to stop looking for things like and where do you stop?*

For peer review only



Paper/Draft/ tables boxes 210512 vs3

**Box 1. Case 27: Illustration of initiation of the process and setting the initial diagnostic frame.**

| Reconstruction                                                                                                                                                                                                                                                                                                                                                                                                                                                                                                                                                                                                                                                                                                                                                                                                                                       | Analysis                                                                                                                                                                                                                                                                                                       |
|------------------------------------------------------------------------------------------------------------------------------------------------------------------------------------------------------------------------------------------------------------------------------------------------------------------------------------------------------------------------------------------------------------------------------------------------------------------------------------------------------------------------------------------------------------------------------------------------------------------------------------------------------------------------------------------------------------------------------------------------------------------------------------------------------------------------------------------------------|----------------------------------------------------------------------------------------------------------------------------------------------------------------------------------------------------------------------------------------------------------------------------------------------------------------|
| <p><b>Presentation</b></p> <p><i>Patient in 70's came with breathlessness .. the first thing was he kept saying to me "this is exactly like it was about 6 months previously".. looked back in his notes and 6 months previously he'd been diagnosed with heart failure and so I thought "well, you know" and he was so insistent that it was the same thing... he was a bit breathless but there wasn't anything really obvious going on .. so I thought maybe he was anaemic as well and that had got worse. And it was a Saturday morning so I couldn't easily get any tests straight away so I booked for him to come back first thing on Monday morning for blood tests and ECG and I sent him up to the hospital for a chest x-ray. He was so insistent that it was the same thing and in retrospect that was really misleading for me</i></p> | <p>Salient feature was patient's insistence that the diagnosis was the same as previously, seemingly confirmed by looking at case notes of his previous presentation.</p> <p>System 2 in action as tests ordered, largely to rule in cardiac failure and rule out possible complicating factor of anaemia.</p> |
| <p><b>Context issues</b></p> <p><i>It was a Saturday morning so I couldn't easily get any tests straight away.</i></p>                                                                                                                                                                                                                                                                                                                                                                                                                                                                                                                                                                                                                                                                                                                               | <p>Management affected by practice environment - routine blood tests not immediately available</p>                                                                                                                                                                                                             |
| <p><b>Outcome</b></p> <p><i>Next day contacted by one of his friends .. to say "actually, he's had a pulmonary embolism .. he'd got quite a lot worse that afternoon and been admitted to hospital and ..CT showed multiple pulmonary emboli.</i></p>                                                                                                                                                                                                                                                                                                                                                                                                                                                                                                                                                                                                | <p>Delay in diagnosis likely to System 1 overpowering System 2, raising closure threshold enough to be affected by context issues (no blood tests available at weekend).</p>                                                                                                                                   |
| <p><b>Summary</b></p> <p>System 1 single diagnosis based on existing label, immediately jumps to the diagnosis. Weak System 2 affected by context issues, delaying diagnosis.</p>                                                                                                                                                                                                                                                                                                                                                                                                                                                                                                                                                                                                                                                                    |                                                                                                                                                                                                                                                                                                                |

**Table 1. Biases arising from salient features of presentation which initiate the diagnostic process and frame the direction of subsequent information gathering.**

|                                                                                               |                                                                                                                                                                                                                                                                         |
|-----------------------------------------------------------------------------------------------|-------------------------------------------------------------------------------------------------------------------------------------------------------------------------------------------------------------------------------------------------------------------------|
| <b>Previous diagnosis label</b>                                                               | <p><i>Because somebody had wrote down that he had bell's palsy and he'd been seen in hospital .. I immediately thought that's what he had (1);</i></p> <p><i>Story of the insect bite and that was what we were sort of using as our diagnostic tool really (6)</i></p> |
| <b>Pre existing psychosocial problems</b>                                                     | <p><i>all thought some of the bleeding might be from sexual abuse (31);</i></p> <p><i>sick notes, and prescriptions and whatever and I thought that that was probably the main reason behind the um sort of um consultations (37)</i></p>                               |
| <b>Reassurance from initial appearance</b>                                                    | <p><i>when I called the patient back I got hold of the granny who said oh yes mum's in the shower that as a clue to me meant that maybe the child wasn't that ill (11);</i></p> <p><i>She wasn't terribly unwell (33)</i></p>                                           |
| <b>Similarity to a recent case or similarity to representative case built from experience</b> | <p><i>My diagnosis was fed by a patient the previous week who'd presented with an ischemic foot (40);</i></p> <p><i>And I thought he had cancer because of the mass and the weight loss and the paleness (44).</i></p>                                                  |
| <b>Incorrect localisation of salient features</b>                                             | <p><i>vomiting and sweating and diarrhoea .. epigastric pain (10);</i></p> <p><i>epigastric discomfort . . . must be indigestion (20).</i></p>                                                                                                                          |
| <b>Common things occurring commonly (Probabilistic reasoning)</b>                             | <p><i>viral infections are common (16);</i></p> <p><i>my preconception at the time was that a young &lt;30 year old is very, very unlikely to have bowel cancer (32)</i></p>                                                                                            |
| <b>Ignoring as well as over or under estimating red flags or critical cues</b>                | <p><i>he came in hopping, which is quite unusual. Not weight bearing at all is quite unusual (30);</i></p> <p><i>normal chest on examination (24)</i></p>                                                                                                               |
| <b>Vague presenting symptoms, no salient features recognised</b>                              | <p><i>fatigue from whatever cause (3); it was all very vague (28);</i></p> <p><i>atypical leg pain couldn't work out what was going on (21)</i></p>                                                                                                                     |

Paper/Draft/ tables boxes 210512 vs3

|  |  |
|--|--|
|  |  |
|--|--|

**Box 2. Case 14: Illustration of dominant System 1 impeding System 2 review at closure, leading to error.**

| Reconstruction                                                                                                                                                                                                                                                                                                                                                                                                                                                                                                                                                                                            | Analysis                                                                                                                                                                                                                                          |
|-----------------------------------------------------------------------------------------------------------------------------------------------------------------------------------------------------------------------------------------------------------------------------------------------------------------------------------------------------------------------------------------------------------------------------------------------------------------------------------------------------------------------------------------------------------------------------------------------------------|---------------------------------------------------------------------------------------------------------------------------------------------------------------------------------------------------------------------------------------------------|
| <p><b>Presentation</b></p> <p><i>Elderly patient seen 6 years ago for what appeared to be resolving haemorrhoidal bleed .. 6 months prior [to the most recent visit] described narrow stools like a snake ..[At the present visit] bowel frequency and some bleeding with examination of clear external piles no rectal masses on PR. Did some bloods but wasn't anaemic.</i></p> <p><i>[I ignored] the older the patient the lower the threshold for colorectal cancer that we would have for referring .. red flag that's there for a reason therefore it would be foolish to sort of dismiss..</i></p> | <p>System 1 dominance may explain the high threshold for vigilance in this age group.</p> <p>No significant attempt to rule out and normal Hb wrongly used for rule in. Another example of the power of a perceived label in biasing process.</p> |
| <p><b>Salience</b></p> <p><i>External piles with a normal PR .. [6 years ago] with haemorrhoides seen by a colleague.</i></p>                                                                                                                                                                                                                                                                                                                                                                                                                                                                             | <p>Salient feature was a normal examination 6 years earlier.</p>                                                                                                                                                                                  |
| <p><b>Outcome</b></p> <p><i>2 months after last visit ..change in bowel habit with rectal bleeding and as part of investigation had a sigmoidoscopy and biopsy which found a malignant colonic tumour</i></p>                                                                                                                                                                                                                                                                                                                                                                                             | <p>Delay in diagnosis likely to System1 overpowering System 2, raising closure threshold.</p>                                                                                                                                                     |
| <p><b>Summary</b></p> <p>System 1 single diagnosis based on label immediately jumps to the diagnosis. Ignored expected natural history, and the presence of a red flag. Diagnosis was delayed until new critical cue emerged.</p>                                                                                                                                                                                                                                                                                                                                                                         |                                                                                                                                                                                                                                                   |

**Table 2. Effect of framing biases on closure thresholds for ruling disease in or out.**

|                                                                           |                                                                                                                                                                                                                                                                                                                                                                                                                                                                                                                                                             |
|---------------------------------------------------------------------------|-------------------------------------------------------------------------------------------------------------------------------------------------------------------------------------------------------------------------------------------------------------------------------------------------------------------------------------------------------------------------------------------------------------------------------------------------------------------------------------------------------------------------------------------------------------|
| <p><b>Presents with diagnosis label</b></p>                               | <p><i>I'd keyed in too quickly and then just ignored any of the sort of differential information (1);</i></p> <p><i>When your brain immediately jumps to the obvious diagnosis its worth just having in the back of your mind what else it could be (6)</i></p>                                                                                                                                                                                                                                                                                             |
| <p><b>Psychosocial label/behavioural</b></p>                              | <p><i>I closed it before she came in .. I think hadn't really thought out the differential diagnosis (4);</i></p> <p><i>Not appreciating the seriousness of the, of the problem, coupled with not really wanting to think about it because the patient was so difficult. (31)</i></p>                                                                                                                                                                                                                                                                       |
| <p><b>Ignores red flag</b></p>                                            | <p><i>[did not] take a step back and consider what we call the sort of red flagged ones, are there any flags in front of you that are presenting information of other serious diseases that might kill or harm? (2);</i></p> <p><i>Think I ought to have thought this severe pain which isn't improving I ought to go back to cancer but so I was put off by the negative investigations and that kind of prior assessment and err .. level of pain which was not otherwise explained (15)</i></p>                                                          |
| <p><b>Ignores possibility of serious disease with low probability</b></p> | <p><i>[ignored] older the patient the lower the threshold for particularly for colorectal cancer that we would have for referring .. red flag that's there for a reason therefore it would be foolish to sort of dismiss (14);</i></p> <p><i>My preconception at the time was that a young 28 year old is very, very unlikely to have bowel cancer .... slightly raised C-reactive protein...it wasn't dramatically raised ... I certainly didn't act on it because I think I was confused by the fact he'd got better the second consultation (32)</i></p> |
| <p><b>Used wrong clinical features to rule-out a condition</b></p>        | <p><i>[ignored] new onset quite severe headache in a (40) something year old is a red flag in itself (22);</i></p> <p><i>We think of ectopic pregnancy as being bleeding and pain and this was painless bleeding (17)</i></p>                                                                                                                                                                                                                                                                                                                               |

Paper/Draft/ tables boxes 210512 vs3

|                             |                                                                                                                                                                                                                                                                                                            |
|-----------------------------|------------------------------------------------------------------------------------------------------------------------------------------------------------------------------------------------------------------------------------------------------------------------------------------------------------|
| <b>Ignored gut feelings</b> | <i>it's a sixth sense .. that I think as you gain more experience you really hone and fine tune .. it's invaluable particularly with children 19; was not terribly unwell ... obviously needed more investigations.. wasn't happy with my decision even though it wasn't a conscious process.<br/>(33)</i> |
|-----------------------------|------------------------------------------------------------------------------------------------------------------------------------------------------------------------------------------------------------------------------------------------------------------------------------------------------------|

For peer review only
